# Supplementary material for: Chemical constituents from Limonium tubiflorum and their in silico evaluation as potential antiviral agents against SARS-CoV-2
Source: PubMed Central journal article supplement — RSC Adv. 2021 Sep 30;11(51):32346–57. doi: 10.1039/d1ra05927k (PMC9042241; doi:10.1039/d1ra05927k), 2021-09-30
Supplement: RA-011-D1RA05927K-s001.pdf [file RA-011-D1RA05927K-s001.pdf]

**Table S1:** NMR Data of compound **1** (CD<sub>3</sub>OD, 600 and 150 MHz for <sup>1</sup>H and <sup>13</sup>C, respectively)

| Position                            | δ <sub>C</sub> | δ <sub>H</sub> ( <i>J</i> in Hz) | COSY<br>Characteristic correlations | HMBC<br>Characteristic correlations |
|-------------------------------------|----------------|----------------------------------|-------------------------------------|-------------------------------------|
| <b>Aglycone (myricetin)</b>         |                |                                  |                                     |                                     |
| <b>2</b>                            | <b>158.0</b>   |                                  |                                     |                                     |
| <b>3</b>                            | <b>135.3</b>   |                                  |                                     |                                     |
| <b>4</b>                            | <b>178.9</b>   |                                  |                                     |                                     |
| <b>5</b>                            | <b>163.1</b>   |                                  |                                     |                                     |
| <b>6</b>                            | <b>99.7</b>    | <b>6.15 (d, 2.1)</b>             |                                     |                                     |
| <b>7</b>                            | <b>165.7</b>   |                                  |                                     |                                     |
| <b>8</b>                            | <b>94.4</b>    | <b>6.32 (d, 2.1)</b>             |                                     |                                     |
| <b>9</b>                            | <b>158.2</b>   |                                  |                                     |                                     |
| <b>10</b>                           | <b>105.9</b>   |                                  |                                     |                                     |
| <b>1'</b>                           | <b>122.0</b>   |                                  |                                     |                                     |
| <b>2'</b>                           | <b>109.8</b>   | <b>7.27 (s)</b>                  |                                     |                                     |
| <b>3'</b>                           | <b>146.4</b>   |                                  |                                     |                                     |
| <b>4'</b>                           | <b>137.9</b>   |                                  |                                     |                                     |
| <b>5'</b>                           | <b>146.4</b>   |                                  |                                     |                                     |
| <b>6'</b>                           | <b>109.8</b>   | <b>7.27 (s)</b>                  |                                     |                                     |
| <b>3-O-galactopyranoside moiety</b> |                |                                  |                                     |                                     |
| <b>1''</b>                          | <b>101.4</b>   | <b>5.78 (d, 8)</b>               | <b>H-2''</b>                        | <b>3, 5'', 3''</b>                  |
| <b>2''</b>                          | <b>74.6</b>    | <b>5.45 (dd, 9.9, 8)</b>         | <b>H-1'', H-3''</b>                 | <b>3'', 1'', 7''</b>                |
| <b>3''</b>                          | <b>73.5</b>    | <b>3.84 (dd, 9.9, 3.4)</b>       | <b>H-2'', H4''</b>                  |                                     |
| <b>4''</b>                          | <b>70.6</b>    | <b>3.96 (dd, 3.3, 1.3)</b>       | <b>H-3'', H-5''</b>                 |                                     |
| <b>5''</b>                          | <b>77.5</b>    | <b>3.61 (t, 6.3)</b>             | <b>H-4'', H-6''</b>                 |                                     |
| <b>6'' (2H)</b>                     | <b>62.1</b>    | <b>3.70 (m)</b>                  | <b>H-5''</b>                        |                                     |
| <b>2''-O-galloyl moiety</b>         |                |                                  |                                     |                                     |
| <b>1'''</b>                         | <b>121.7</b>   | <b>-</b>                         |                                     |                                     |
| <b>2'''</b>                         | <b>110.7</b>   | <b>7.14 (s)</b>                  |                                     |                                     |
| <b>3'''</b>                         | <b>146.3</b>   | <b>-</b>                         |                                     |                                     |
| <b>4'''</b>                         | <b>139.9</b>   | <b>-</b>                         |                                     |                                     |
| <b>5'''</b>                         | <b>146.3</b>   | <b>-</b>                         |                                     |                                     |
| <b>6'''</b>                         | <b>110.7</b>   | <b>7.14 (s)</b>                  |                                     |                                     |
| <b>7''' (C=O)</b>                   | <b>168.4</b>   | <b>-</b>                         |                                     |                                     |

**Table S2:** NMR Data of compound **2** (CD<sub>3</sub>OD, 600 and 150 MHz for <sup>1</sup>H and <sup>13</sup>C, respectively)

| <b>Position</b>                   | <b>δ<sub>C</sub></b> | <b>δ<sub>H</sub> (J in Hz)</b> | <b>COSY</b><br>Characteristic correlations |
|-----------------------------------|----------------------|--------------------------------|--------------------------------------------|
| <b>Aglycone (myricetin)</b>       |                      |                                |                                            |
| <b>2</b>                          | <b>158.6</b>         |                                |                                            |
| <b>3</b>                          | <b>135.7</b>         |                                |                                            |
| <b>4</b>                          | <b>179.4</b>         |                                |                                            |
| <b>5</b>                          | <b>163.3</b>         |                                |                                            |
| <b>6</b>                          | <b>99.9</b>          | <b>6.19 (d, 2.1)</b>           |                                            |
| <b>7</b>                          | <b>166.0</b>         |                                |                                            |
| <b>8</b>                          | <b>94.7</b>          | <b>6.36 (d, 2.1)</b>           |                                            |
| <b>9</b>                          | <b>159.5</b>         |                                |                                            |
| <b>10</b>                         | <b>105.9</b>         |                                |                                            |
| <b>1'</b>                         | <b>121.8</b>         |                                |                                            |
| <b>2'</b>                         | <b>110.4</b>         | <b>7.07 (s)</b>                |                                            |
| <b>3'</b>                         | <b>146.5</b>         |                                |                                            |
| <b>4'</b>                         | <b>138.0</b>         |                                |                                            |
| <b>5'</b>                         | <b>146.5</b>         |                                |                                            |
| <b>6'</b>                         | <b>110.4</b>         | <b>7.07 (s)</b>                |                                            |
| <b>3-O-rhamnopyranosyl moiety</b> |                      |                                |                                            |
| <b>1''</b>                        | <b>100.5</b>         | <b>5.51 (d, 1.5)</b>           | <b>H-2''</b>                               |
| <b>2''</b>                        | <b>73.5</b>          | <b>5.63 (dd, 3.3, 1.7)</b>     | <b>H-1'', H-3''</b>                        |
| <b>3''</b>                        | <b>70.8</b>          | <b>4.04 (dd, 9.5, 3.3)</b>     | <b>H-2''', H-4'''</b>                      |
| <b>4''</b>                        | <b>73.9</b>          | <b>3.47 (t, 9.7)</b>           | <b>H-3''', H-5'''</b>                      |
| <b>5''</b>                        | <b>72.3</b>          | <b>3.49 (dd, 9.7, 6.3)</b>     | <b>H4''', H-6'''</b>                       |
| <b>6''</b>                        | <b>17.8</b>          | <b>1.04 (d, 6)</b>             | <b>H-5'''</b>                              |
| <b>2''-O-galloyl moiety</b>       |                      |                                |                                            |
| <b>1'''</b>                       | <b>121.3</b>         | -                              |                                            |
| <b>2'''</b>                       | <b>109.6</b>         | <b>6.98 (s)</b>                |                                            |
| <b>3'''</b>                       | <b>146.9</b>         | -                              |                                            |
| <b>4'''</b>                       | <b>140.0</b>         | -                              |                                            |
| <b>5'''</b>                       | <b>146.9</b>         | -                              |                                            |
| <b>6'''</b>                       | <b>109.6</b>         | <b>6.98 (s)</b>                |                                            |
| <b>7''' (C=O)</b>                 | <b>167.5</b>         | -                              |                                            |

**Table S3:** NMR Data of compound **3** (CD<sub>3</sub>OD, 400 and 100 MHz for <sup>1</sup>H and <sup>13</sup>C, respectively)

| <b>Position</b>                   | <b>δ<sub>C</sub></b> | <b>δ<sub>H</sub> (J in Hz)</b> | <b>COSY</b><br>Characteristic correlations | <b>HMBC</b><br>Characteristic correlations |
|-----------------------------------|----------------------|--------------------------------|--------------------------------------------|--------------------------------------------|
| <b>Aglycone (myricetin)</b>       |                      |                                |                                            |                                            |
| <b>2</b>                          | <b>157.1</b>         |                                |                                            |                                            |
| <b>3</b>                          | <b>135.0</b>         |                                |                                            |                                            |
| <b>4</b>                          | <b>178.2</b>         |                                |                                            |                                            |
| <b>5</b>                          | <b>161.8</b>         |                                |                                            |                                            |
| <b>6</b>                          | <b>98.4</b>          | <b>6.20 (d, 1.6)</b>           |                                            |                                            |
| <b>7</b>                          | <b>164.5</b>         |                                |                                            |                                            |
| <b>8</b>                          | <b>93.3</b>          | <b>6.37 (d, 1.6)</b>           |                                            |                                            |
| <b>9</b>                          | <b>158.0</b>         |                                |                                            |                                            |
| <b>10</b>                         | <b>104.5</b>         |                                |                                            |                                            |
| <b>1'</b>                         | <b>120.5</b>         |                                |                                            |                                            |
| <b>2'</b>                         | <b>108.2</b>         | <b>6.99 (s)</b>                |                                            |                                            |
| <b>3'</b>                         | <b>145.5</b>         |                                |                                            |                                            |
| <b>4'</b>                         | <b>136.5</b>         |                                |                                            |                                            |
| <b>5'</b>                         | <b>145.5</b>         |                                |                                            |                                            |
| <b>6'</b>                         | <b>108.2</b>         | <b>6.99 (s)</b>                |                                            |                                            |
| <b>3-O-rhamnopyranosyl moiety</b> |                      |                                |                                            |                                            |
| <b>1''</b>                        | <b>102.3</b>         | <b>5.28 (d, 1.4)</b>           | <b>H-2''</b>                               | <b>3, 5'', 3''</b>                         |
| <b>2''</b>                        | <b>70.9</b>          | <b>4.48 (dd, 3.1, 1.4)</b>     | <b>H-1'', H-3''</b>                        |                                            |
| <b>3''</b>                        | <b>69.5</b>          | <b>5.24 (dd, 9.1, 3.1)</b>     | <b>H-2'', H-4''</b>                        | <b>5'', 7''</b>                            |
| <b>4''</b>                        | <b>73.9</b>          | <b>3.69 (m, overlaped)</b>     | <b>H-3'', H-5''</b>                        |                                            |
| <b>5''</b>                        | <b>68.6</b>          | <b>3.69 (m, overlaped)</b>     | <b>H4'', H-6''</b>                         |                                            |
| <b>6''</b>                        | <b>16.3</b>          | <b>1.0 (d, 5.6)</b>            | <b>H-5''</b>                               |                                            |
| <b>3''-O-galloyl moiety</b>       |                      |                                |                                            |                                            |
| <b>1'''</b>                       | <b>120.2</b>         | <b>-</b>                       |                                            |                                            |
| <b>2'''</b>                       | <b>109.1</b>         | <b>7.17 (s)</b>                |                                            |                                            |
| <b>3'''</b>                       | <b>145.0</b>         | <b>-</b>                       |                                            |                                            |
| <b>4'''</b>                       | <b>138.5</b>         | <b>-</b>                       |                                            |                                            |
| <b>5'''</b>                       | <b>145.0</b>         | <b>-</b>                       |                                            |                                            |
| <b>6'''</b>                       | <b>109.1</b>         | <b>7.17 (s)</b>                |                                            |                                            |
| <b>7''' (C=O)</b>                 | <b>167.0</b>         | <b>-</b>                       |                                            |                                            |

**Table S4:** NMR Data of compound **4** (CD<sub>3</sub>OD, 400 and 100 MHz for <sup>1</sup>H and <sup>13</sup>C, respectively)

| <b>Position</b>    | <b>δ<sub>C</sub></b> | <b>δ<sub>H</sub> (<i>J</i> in Hz)</b> |
|--------------------|----------------------|---------------------------------------|
| <b>Gallic acid</b> |                      |                                       |
| <b>1</b>           | <b>122.3</b>         | <b>-</b>                              |
| <b>2</b>           | <b>110.3</b>         | <b>6.93 (s)</b>                       |
| <b>3</b>           | <b>146.4</b>         | <b>-</b>                              |
| <b>4</b>           | <b>139.5</b>         | <b>-</b>                              |
| <b>5</b>           | <b>146.4</b>         | <b>-</b>                              |
| <b>6</b>           | <b>110.3</b>         | <b>6.93 (s)</b>                       |
| <b>7</b>           | <b>170.6</b>         | <b>-</b>                              |

**Table S5:** NMR Data of compound **5** (CD<sub>3</sub>OD, 400 and 100 MHz for <sup>1</sup>H and <sup>13</sup>C, respectively)

| <b>Position</b>                     | <b>δ<sub>C</sub></b> | <b>δ<sub>H</sub> (J in Hz)</b> |
|-------------------------------------|----------------------|--------------------------------|
| <b>Aglycone (myricetin)</b>         |                      |                                |
| <b>2</b>                            | <b>157.0</b>         |                                |
| <b>3</b>                            | <b>134.6</b>         |                                |
| <b>4</b>                            | <b>177.9</b>         |                                |
| <b>5</b>                            | <b>161.1</b>         |                                |
| <b>6</b>                            | <b>98.6</b>          | <b>6.22 (d, 2)</b>             |
| <b>7</b>                            | <b>164.2</b>         |                                |
| <b>8</b>                            | <b>93.3</b>          | <b>6.42 (d, 2)</b>             |
| <b>9</b>                            | <b>157.5</b>         |                                |
| <b>10</b>                           | <b>105.9</b>         |                                |
| <b>1'</b>                           | <b>121.7</b>         |                                |
| <b>2'</b>                           | <b>108.5</b>         | <b>7.41 (s)</b>                |
| <b>3'</b>                           | <b>145.0</b>         |                                |
| <b>4'</b>                           | <b>137.0</b>         |                                |
| <b>5'</b>                           | <b>145.0</b>         |                                |
| <b>6'</b>                           | <b>108.5</b>         | <b>7.41 (s)</b>                |
| <b>3-O-galactopyranoside moiety</b> |                      |                                |
| <b>1''</b>                          | <b>104.2</b>         | <b>5.19 (d, 7.8)</b>           |
| <b>2''</b>                          | <b>71.8</b>          | <b>3.90 (dd, 9.5, 7.8)</b>     |
| <b>3''</b>                          | <b>75.8</b>          | <b>3.70 (dd, 9.5, 3.4)</b>     |
| <b>4''</b>                          | <b>68.6</b>          | <b>3.65 (dd, 3.0, 1.5)</b>     |
| <b>5''</b>                          | <b>73.7</b>          | <b>3.61 (t, 6.3)</b>           |
| <b>6''a</b>                         | <b>60.5</b>          | <b>3.86 (dd, 10.3, 6.0)</b>    |
| <b>6''b</b>                         |                      | <b>3.52 (dd, 10.3, 6.7)</b>    |

**Table S6:** NMR Data of compound **6** (DMSO-d<sub>6</sub>, 600 and 150 MHz for <sup>1</sup>H and <sup>13</sup>C, respectively)

| <b>Position</b>            | <b>δ<sub>C</sub></b> | <b>δ<sub>H</sub> (J in Hz)</b> |
|----------------------------|----------------------|--------------------------------|
| <b>Aglycone (apigenin)</b> |                      |                                |
| <b>2</b>                   | <b>165.1</b>         | <b>-</b>                       |
| <b>3</b>                   | <b>103.8</b>         | <b>6.59 (s)</b>                |
| <b>4</b>                   | <b>182.9</b>         | <b>-</b>                       |
| <b>5</b>                   | <b>162.4</b>         | <b>-</b>                       |
| <b>6</b>                   | <b>100.1</b>         | <b>6.12 (d, 2.1)</b>           |
| <b>7</b>                   | <b>165.2</b>         | <b>-</b>                       |
| <b>8</b>                   | <b>95.3</b>          | <b>6.41 (d, 2.1)</b>           |
| <b>9</b>                   | <b>158.5</b>         | <b>-</b>                       |
| <b>10</b>                  | <b>104.8</b>         | <b>-</b>                       |
| <b>1'</b>                  | <b>122.4</b>         | <b>-</b>                       |
| <b>2'</b>                  | <b>129.6</b>         | <b>7.79 (d, 8.9)</b>           |
| <b>3'</b>                  | <b>117.2</b>         | <b>6.86 (d, 8.9)</b>           |
| <b>4'</b>                  | <b>162.1</b>         | <b>-</b>                       |
| <b>5'</b>                  | <b>117.2</b>         | <b>6.86 (d, 8.9)</b>           |
| <b>6'</b>                  | <b>129.6</b>         | <b>7.79 (d, 8.9)</b>           |

**Table S7:** NMR Data of compound **7** (CD<sub>3</sub>OD, 400 and 100 MHz for <sup>1</sup>H and <sup>13</sup>C, respectively)

| <b>Position</b>             | <b>δ<sub>C</sub></b> | <b>δ<sub>H</sub> (<i>J</i> in Hz)</b> |
|-----------------------------|----------------------|---------------------------------------|
| <b>Aglycone (myricetin)</b> |                      |                                       |
| <b>2</b>                    | <b>146.6</b>         |                                       |
| <b>3</b>                    | <b>135.9</b>         |                                       |
| <b>4</b>                    | <b>175.9</b>         |                                       |
| <b>5</b>                    | <b>161.1</b>         |                                       |
| <b>6</b>                    | <b>97.8</b>          | <b>6.20 (d, 2)</b>                    |
| <b>7</b>                    | <b>164.2</b>         |                                       |
| <b>8</b>                    | <b>92.9</b>          | <b>6.40 (d, 2)</b>                    |
| <b>9</b>                    | <b>156.8</b>         |                                       |
| <b>10</b>                   | <b>103.1</b>         |                                       |
| <b>1'</b>                   | <b>121.7</b>         |                                       |
| <b>2'</b>                   | <b>107.1</b>         | <b>7.36 (s)</b>                       |
| <b>3'</b>                   | <b>145.3</b>         |                                       |
| <b>4'</b>                   | <b>135.5</b>         |                                       |
| <b>5'</b>                   | <b>145.3</b>         |                                       |
| <b>6'</b>                   | <b>107.1</b>         | <b>7.36 (s)</b>                       |

**Table S8:** NMR Data of compound **8** (CD<sub>3</sub>OD, 400 and 100 MHz for <sup>1</sup>H and <sup>13</sup>C, respectively)

| <b>Position</b>      | <b>δ<sub>C</sub></b> | <b>δ<sub>H</sub> (<i>J</i> in Hz)</b> |
|----------------------|----------------------|---------------------------------------|
| <b>Ethyl gallate</b> |                      |                                       |
| <b>1</b>             | 120.4                | -                                     |
| <b>2</b>             | 108.9                | 7.07 (s)                              |
| <b>3</b>             | 145.1                | -                                     |
| <b>4</b>             | 138.3                | -                                     |
| <b>5</b>             | 145.1                | -                                     |
| <b>6</b>             | 108.9                | 7.07 (s)                              |
| <b>7</b>             | 167.6                | -                                     |
| <b>8</b>             | 60.3                 | 4.28 (q, 6.68)                        |
| <b>9</b>             | 13.2                 | 1.35 (t, 6.44)                        |



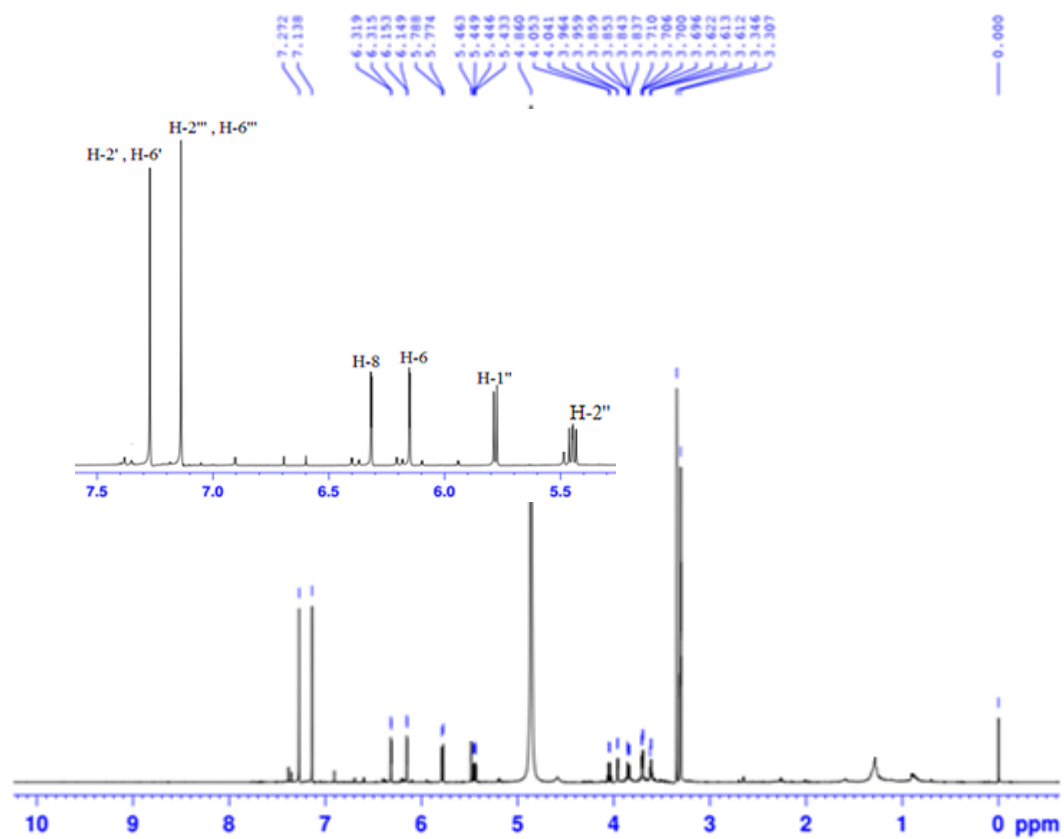

**Fig. S1.**  $^1\text{H-NMR}$  spectrum (600 MHz,  $\text{CD}_3\text{OD}$ ) of compound **1**

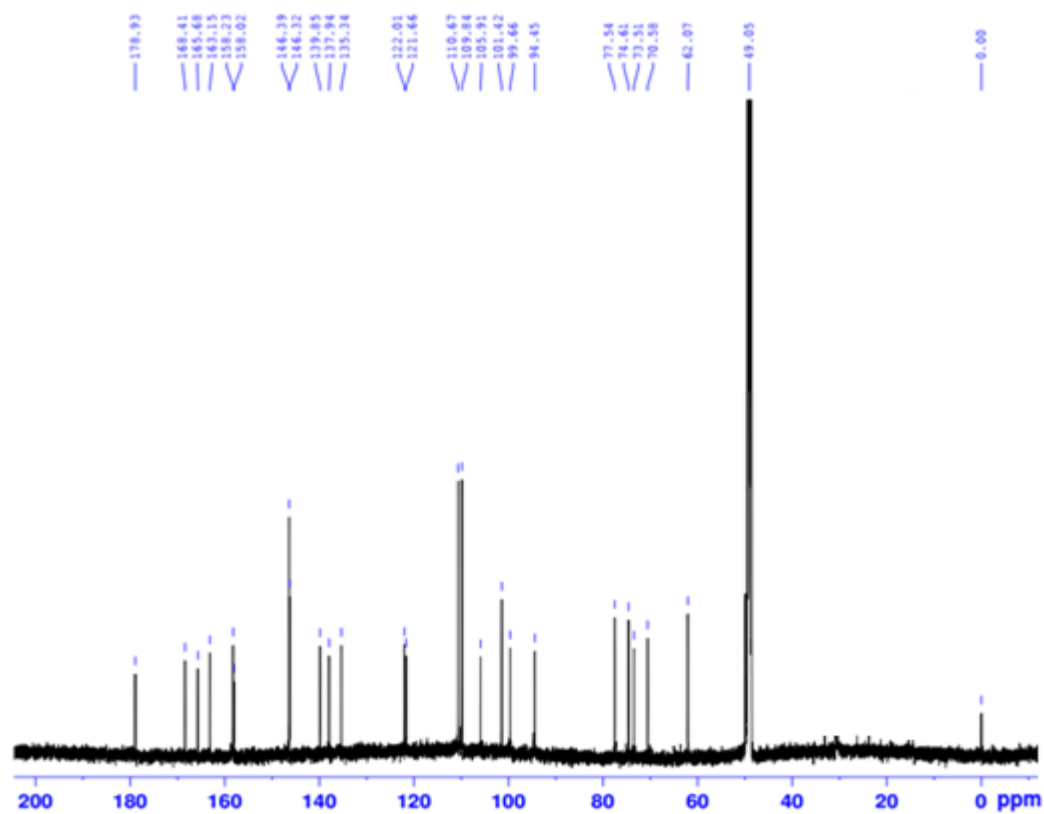

**Fig. S2.**  $^{13}\text{C-NMR}$  spectrum (150 MHz,  $\text{CD}_3\text{OD}$ ) of compound **1**

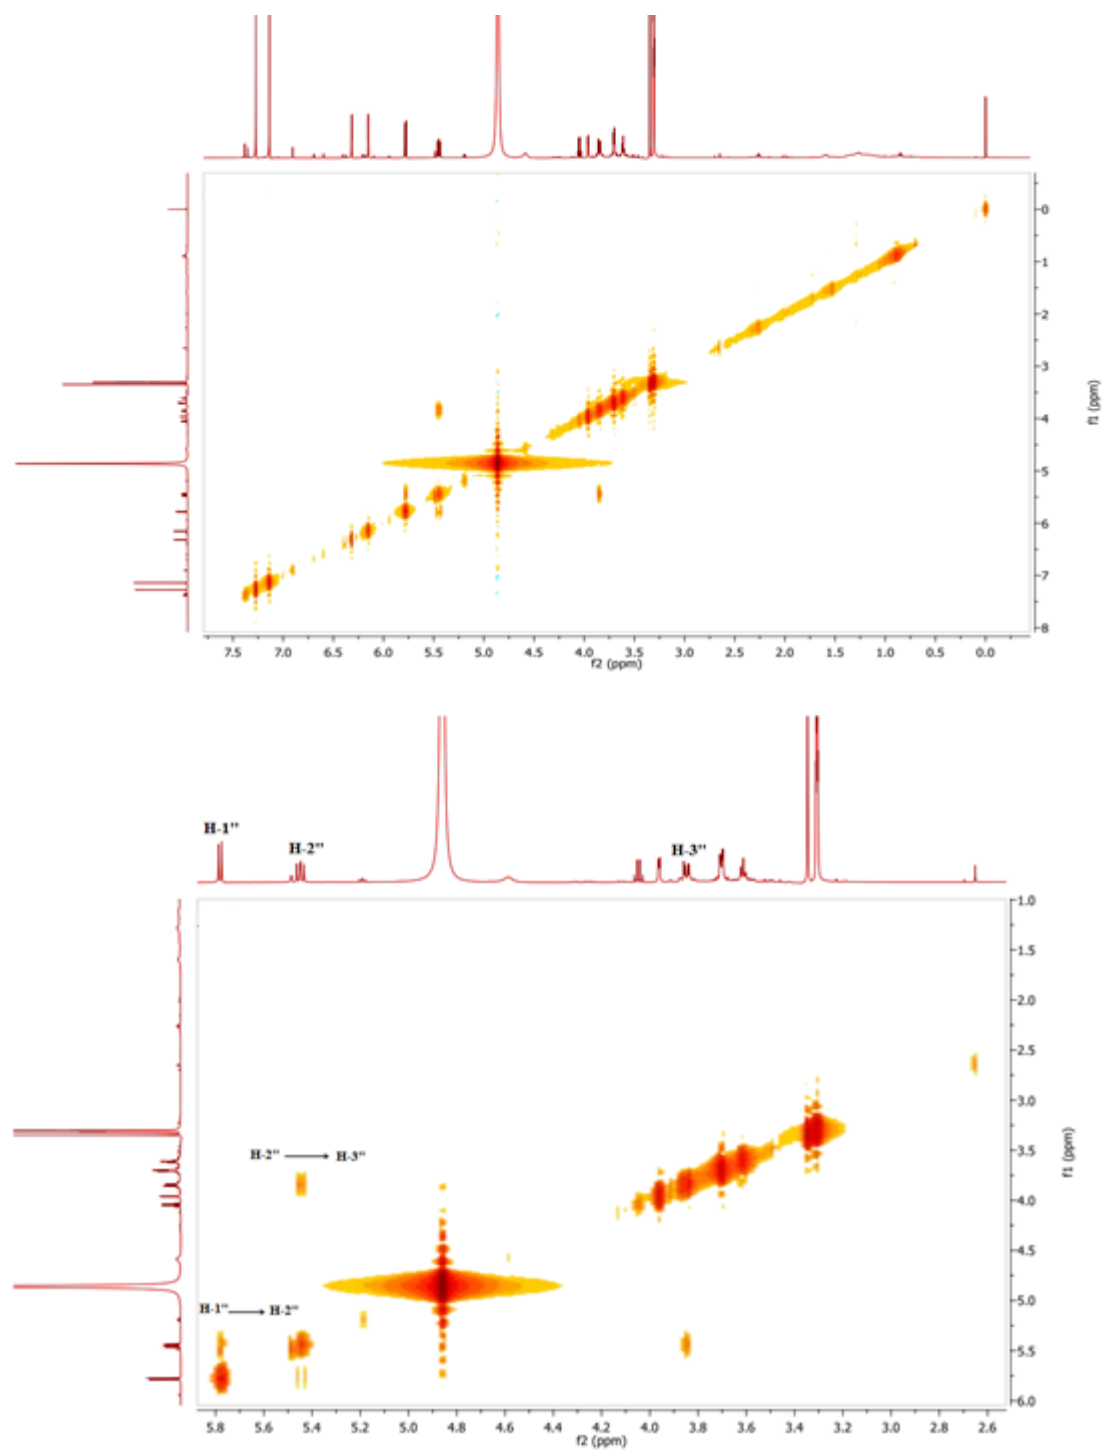

**Fig. S3.** COSY spectrum of compound **1**

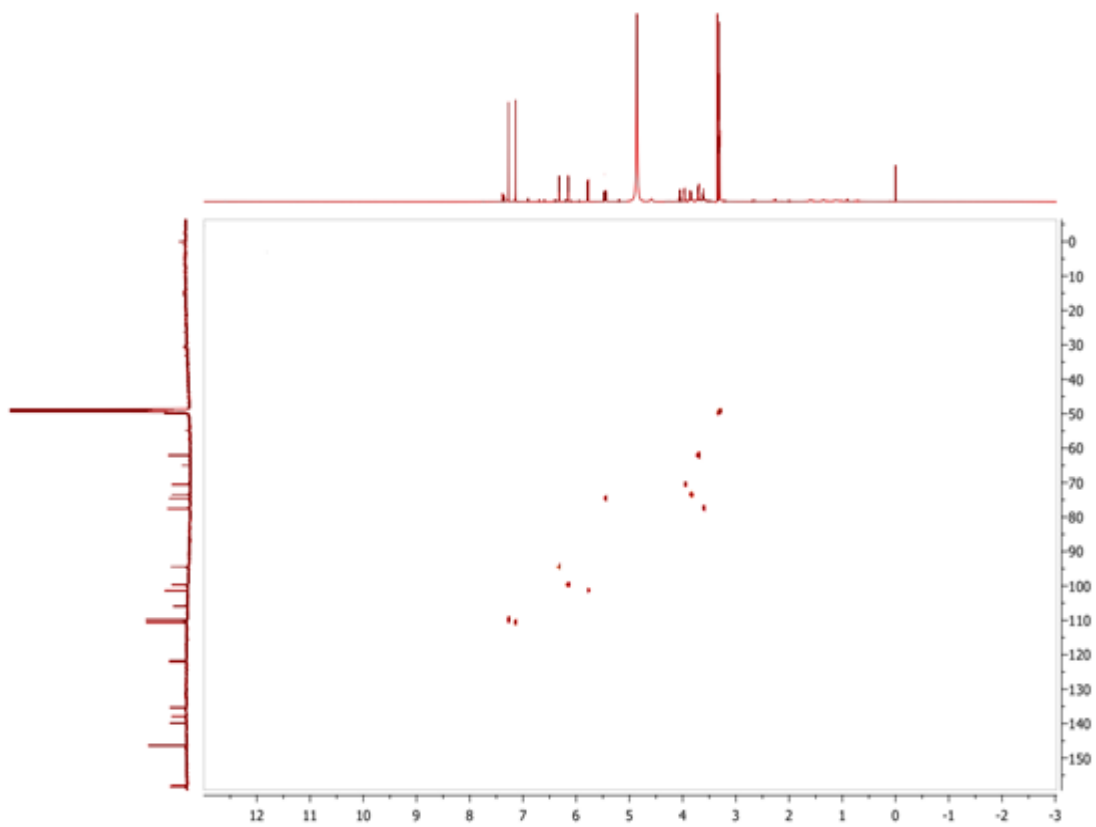

**Fig. S4.** HSQC spectrum of compound **1**

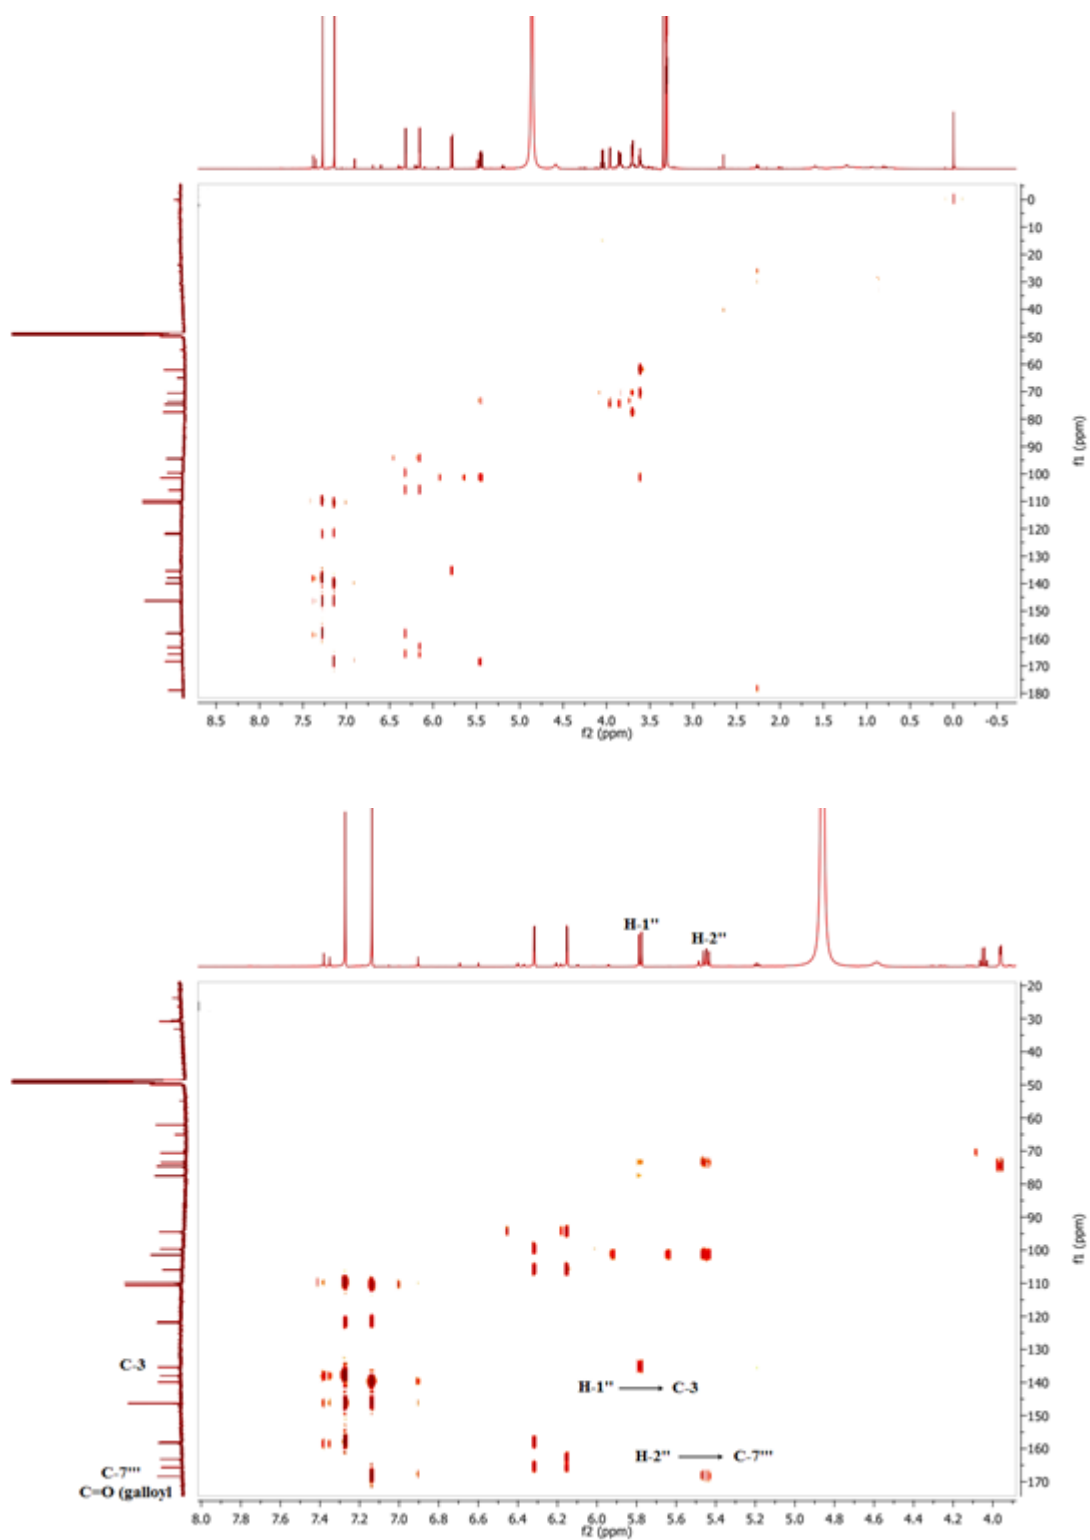

Fig. S5. HMBC spectrum of compound 1

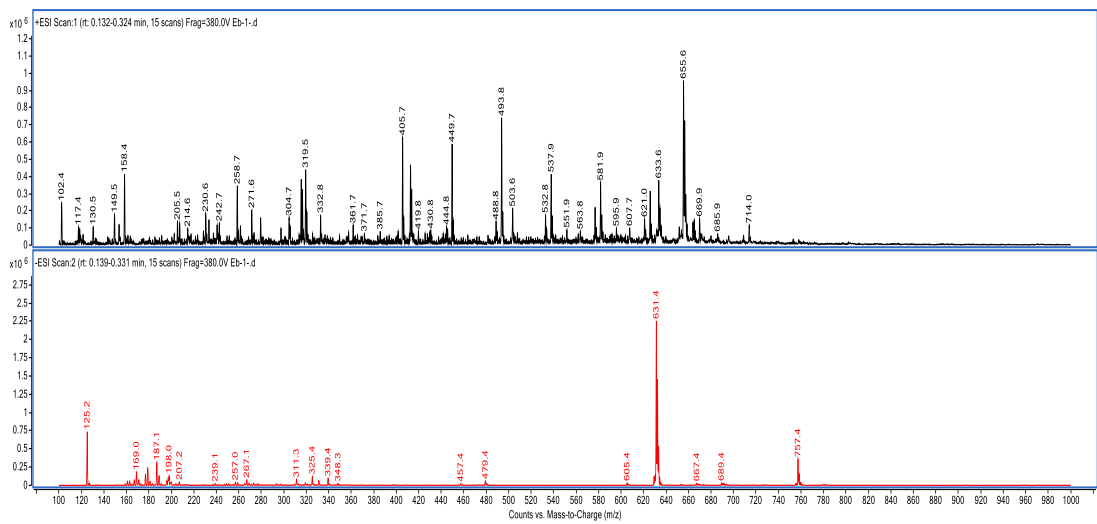

**Fig. S6.** ESI-MS  $m/z$  of compound **1**

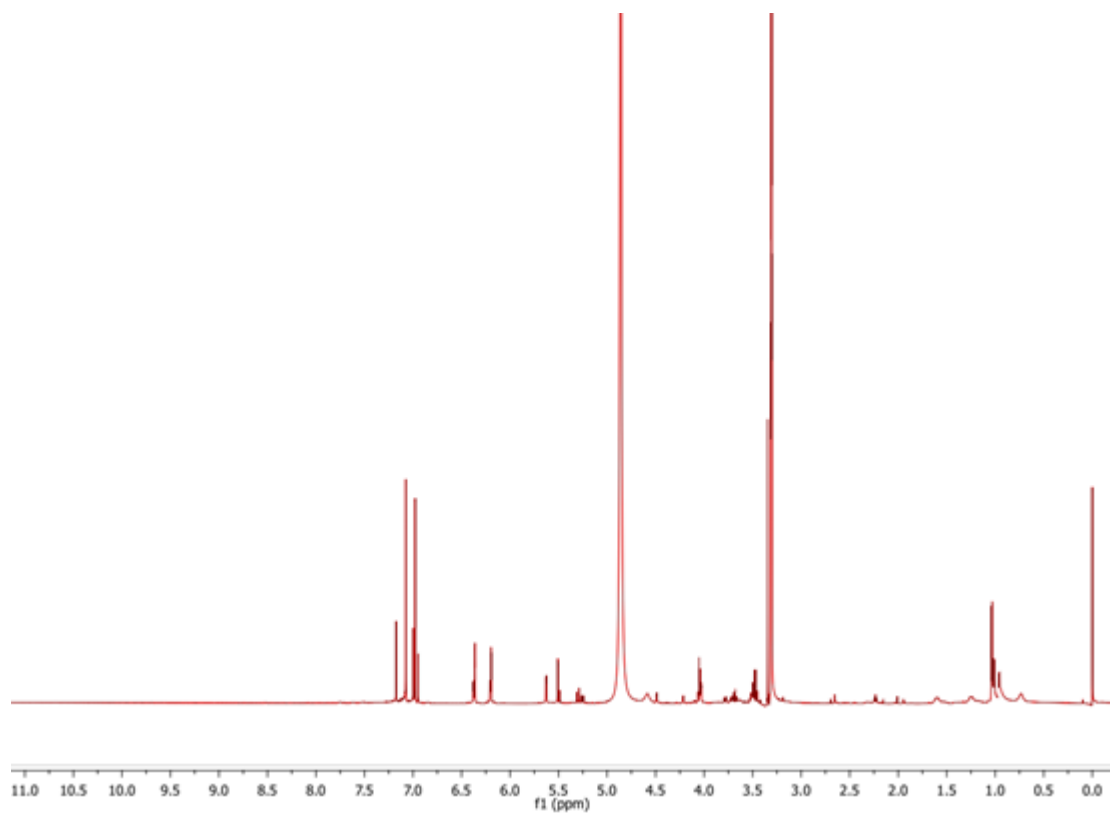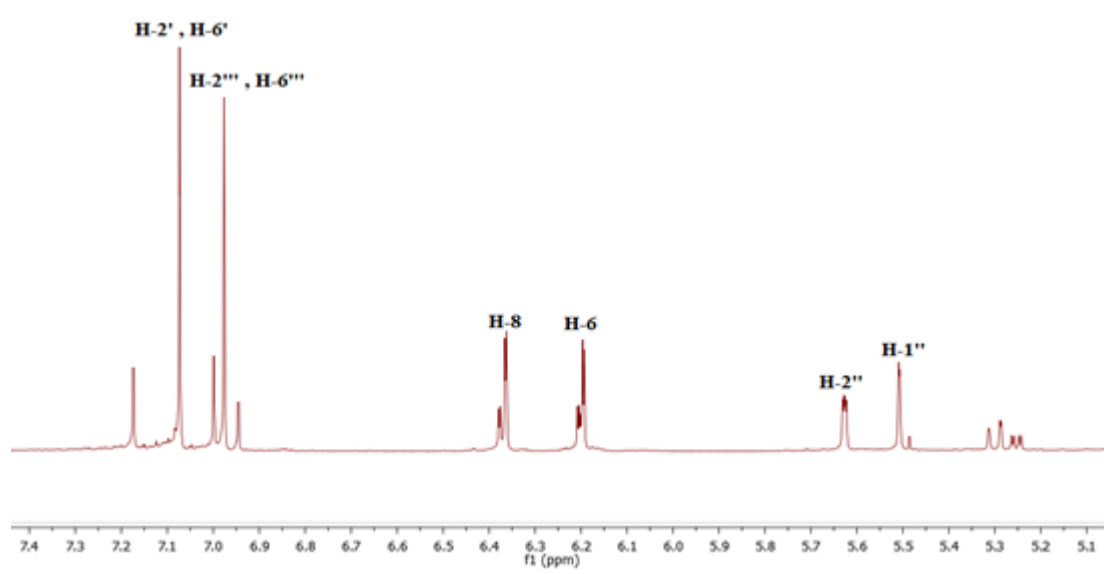

**Fig. S7.**  $^1\text{H}$ -NMR spectrum (600 MHz,  $\text{CD}_3\text{OD}$ ) of compound **2**

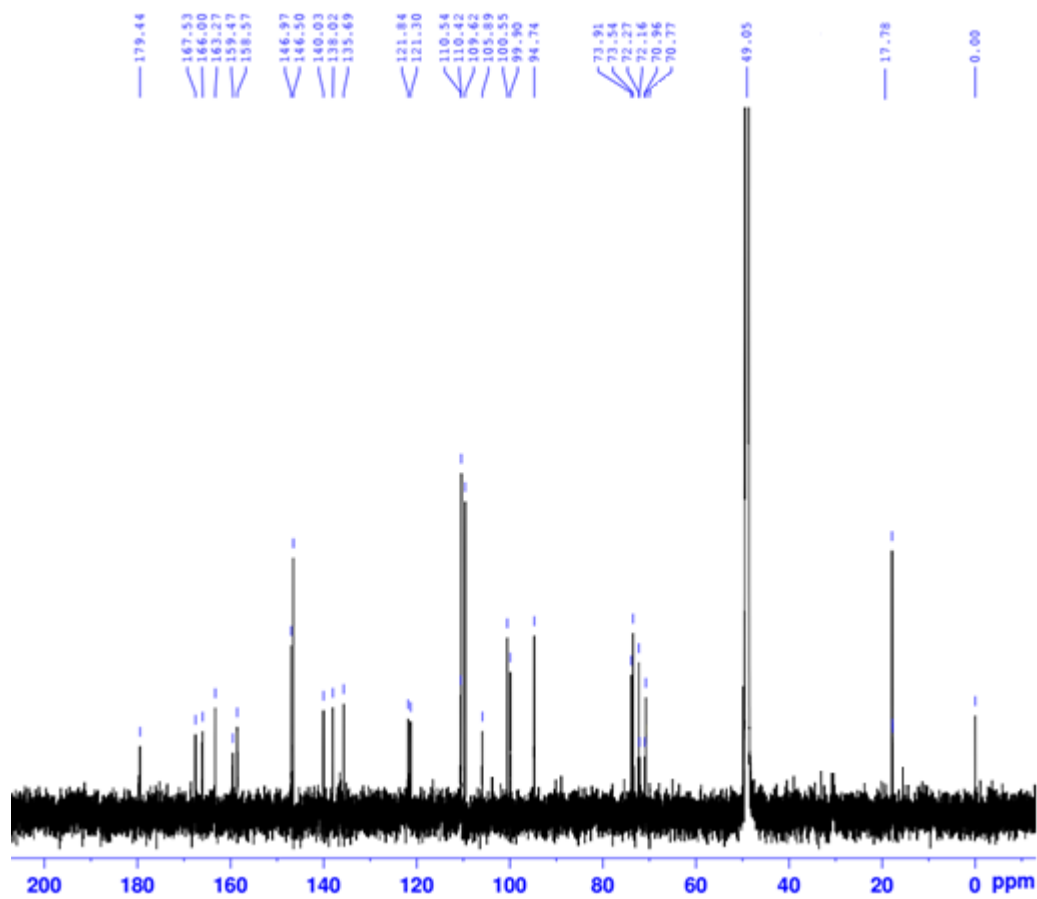

**Fig. S8.**  $^{13}\text{C}$ -NMR spectrum (150 MHz,  $\text{CD}_3\text{OD}$ ) of compound 2

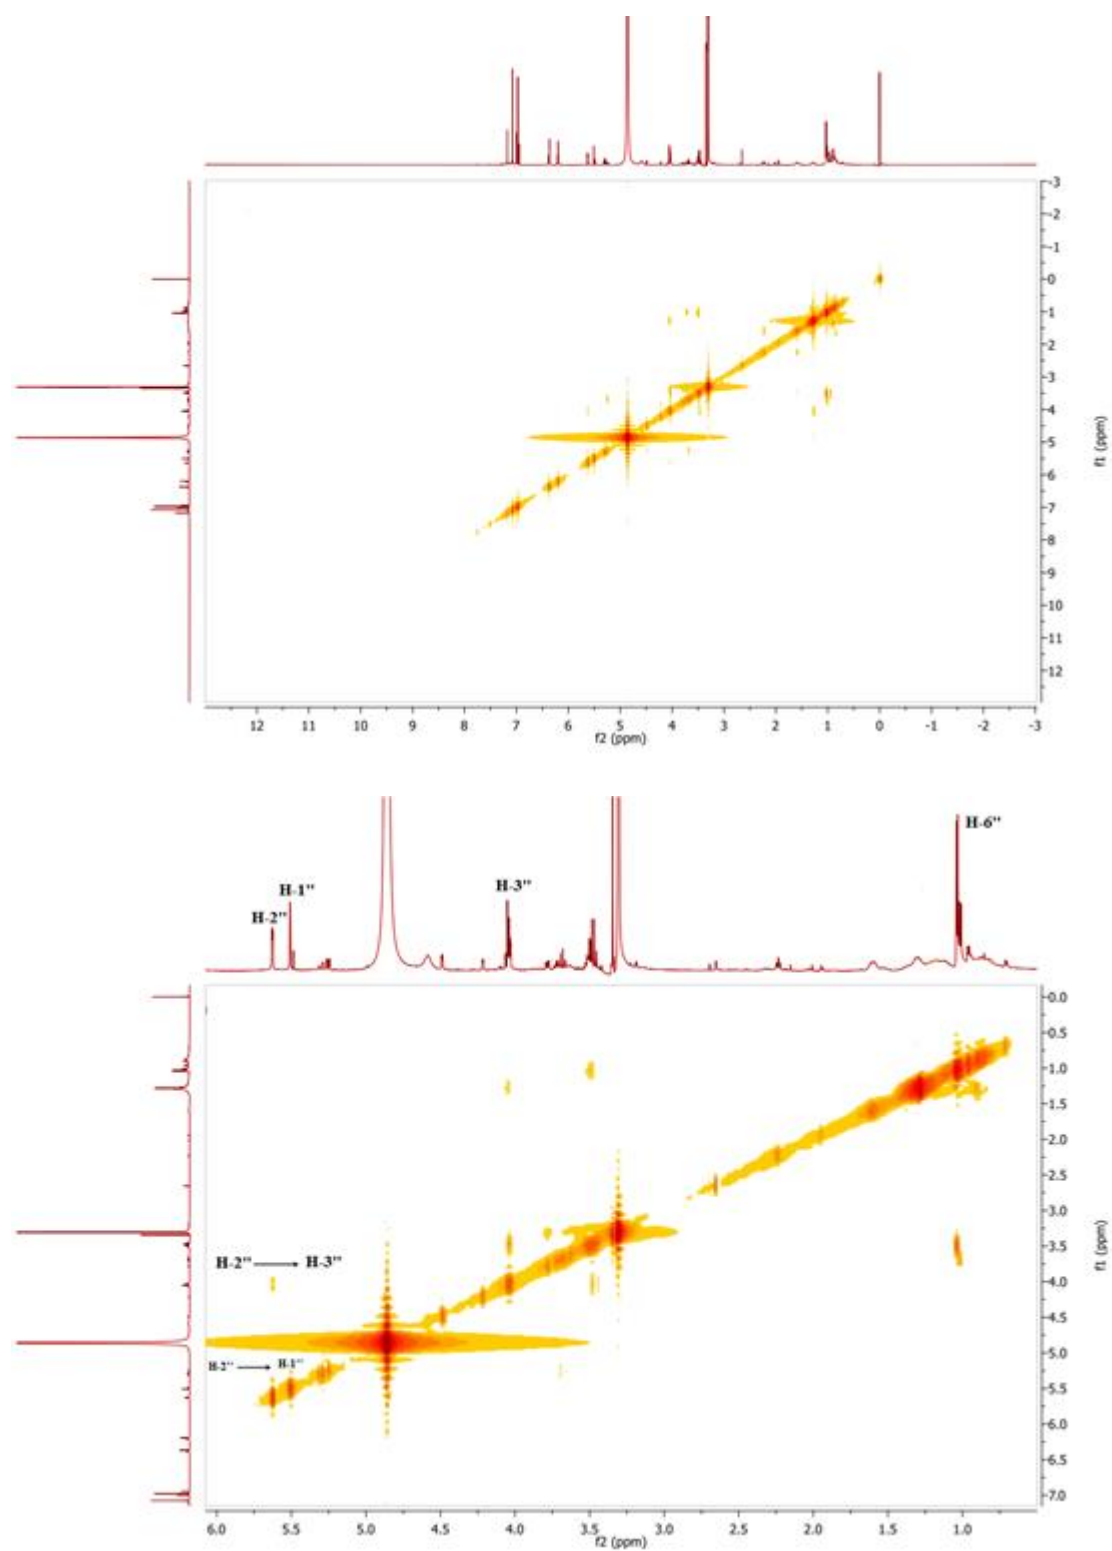

**Fig. S9.** COSY spectrum of compound **2**



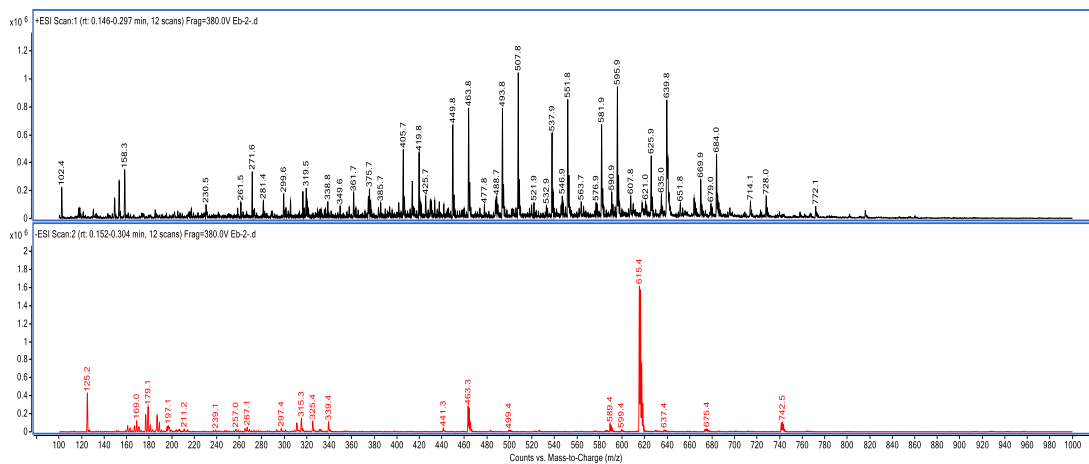

**Fig. S10.** ESI-MS  $m/z$  of compound 2

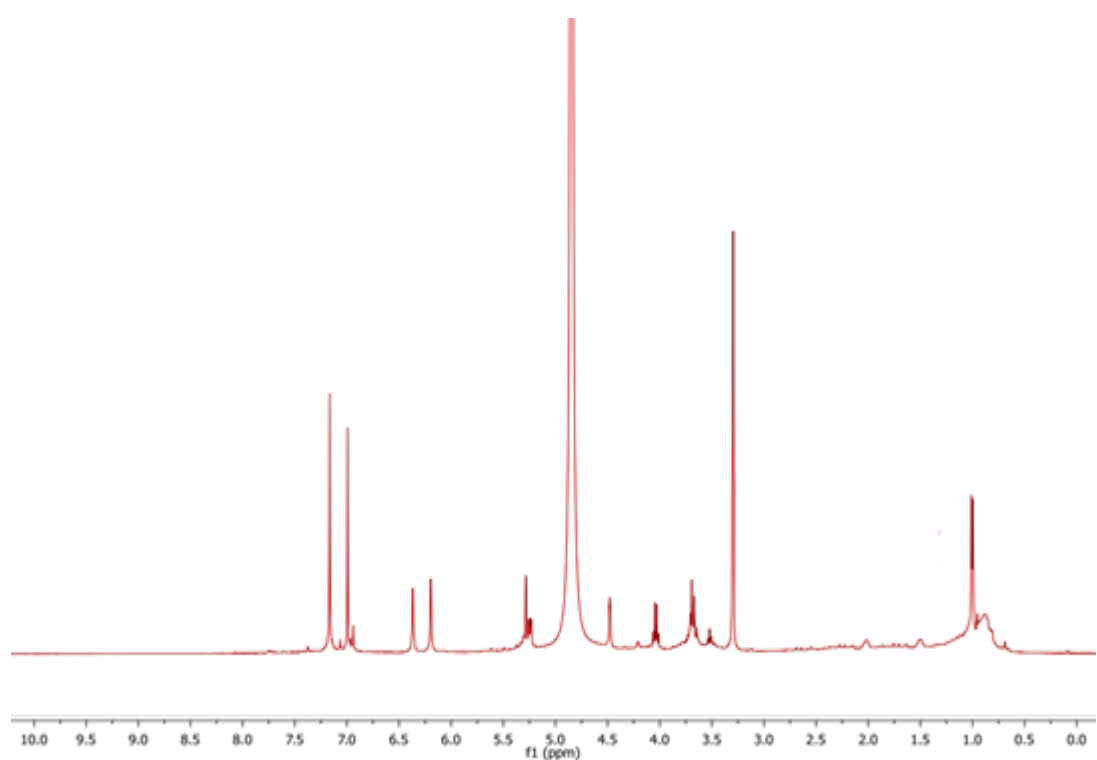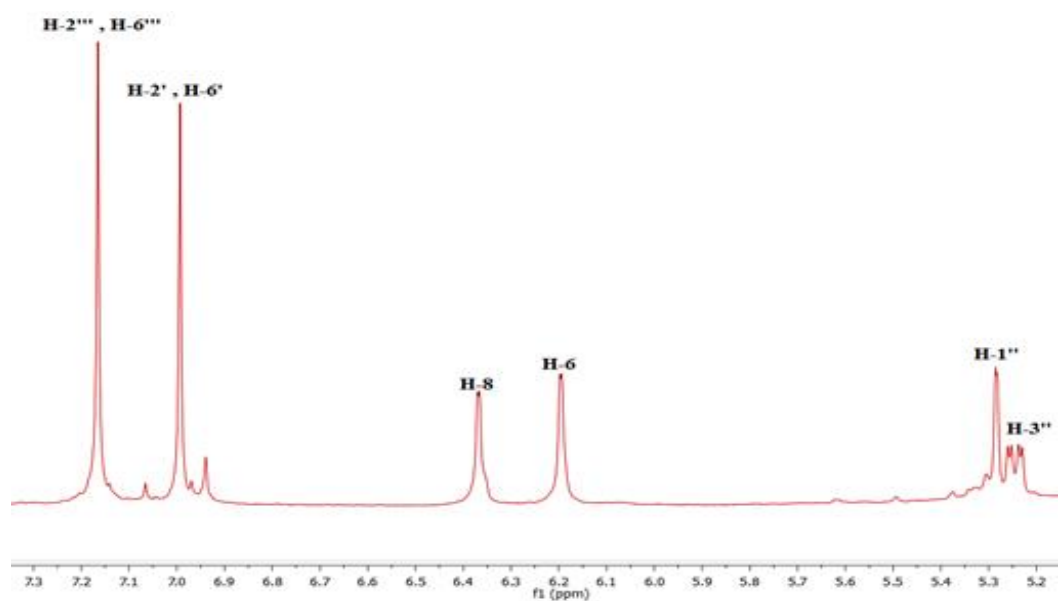

**Fig. S11.** <sup>1</sup>H-NMR spectrum (400 MHz, CD<sub>3</sub>OD) of compound **3**

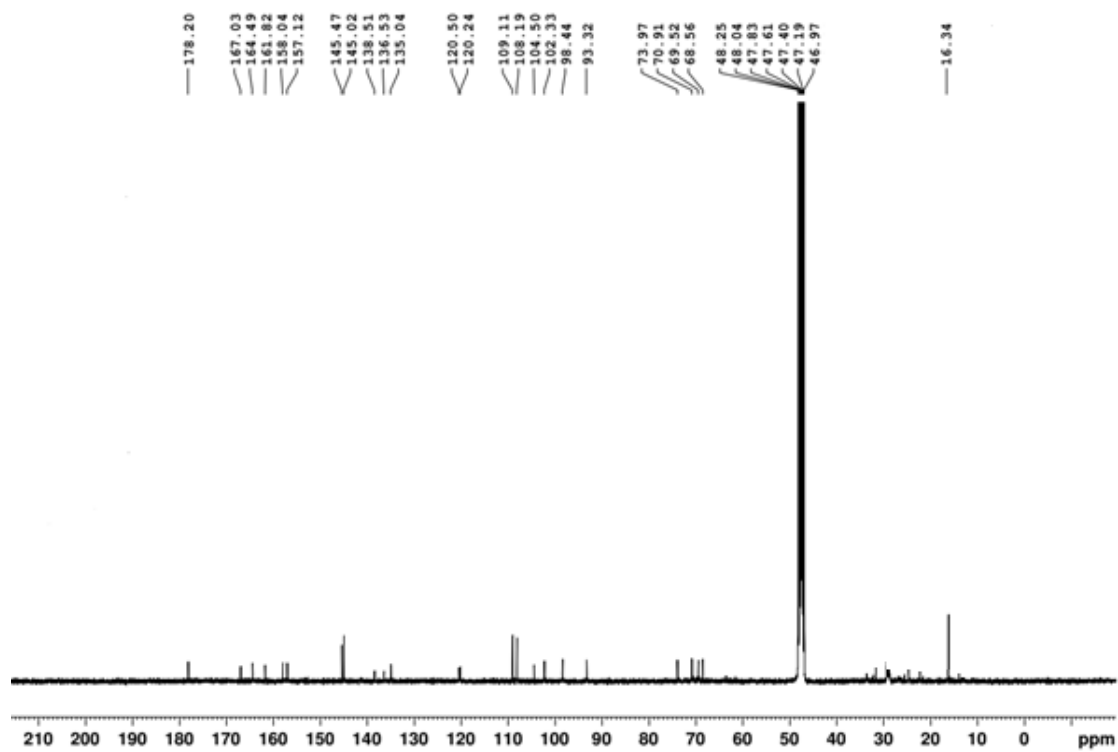

**Fig. S12.**  $^{13}\text{C}$ -NMR spectrum (100 MHz,  $\text{CD}_3\text{OD}$ ) of compound **3**

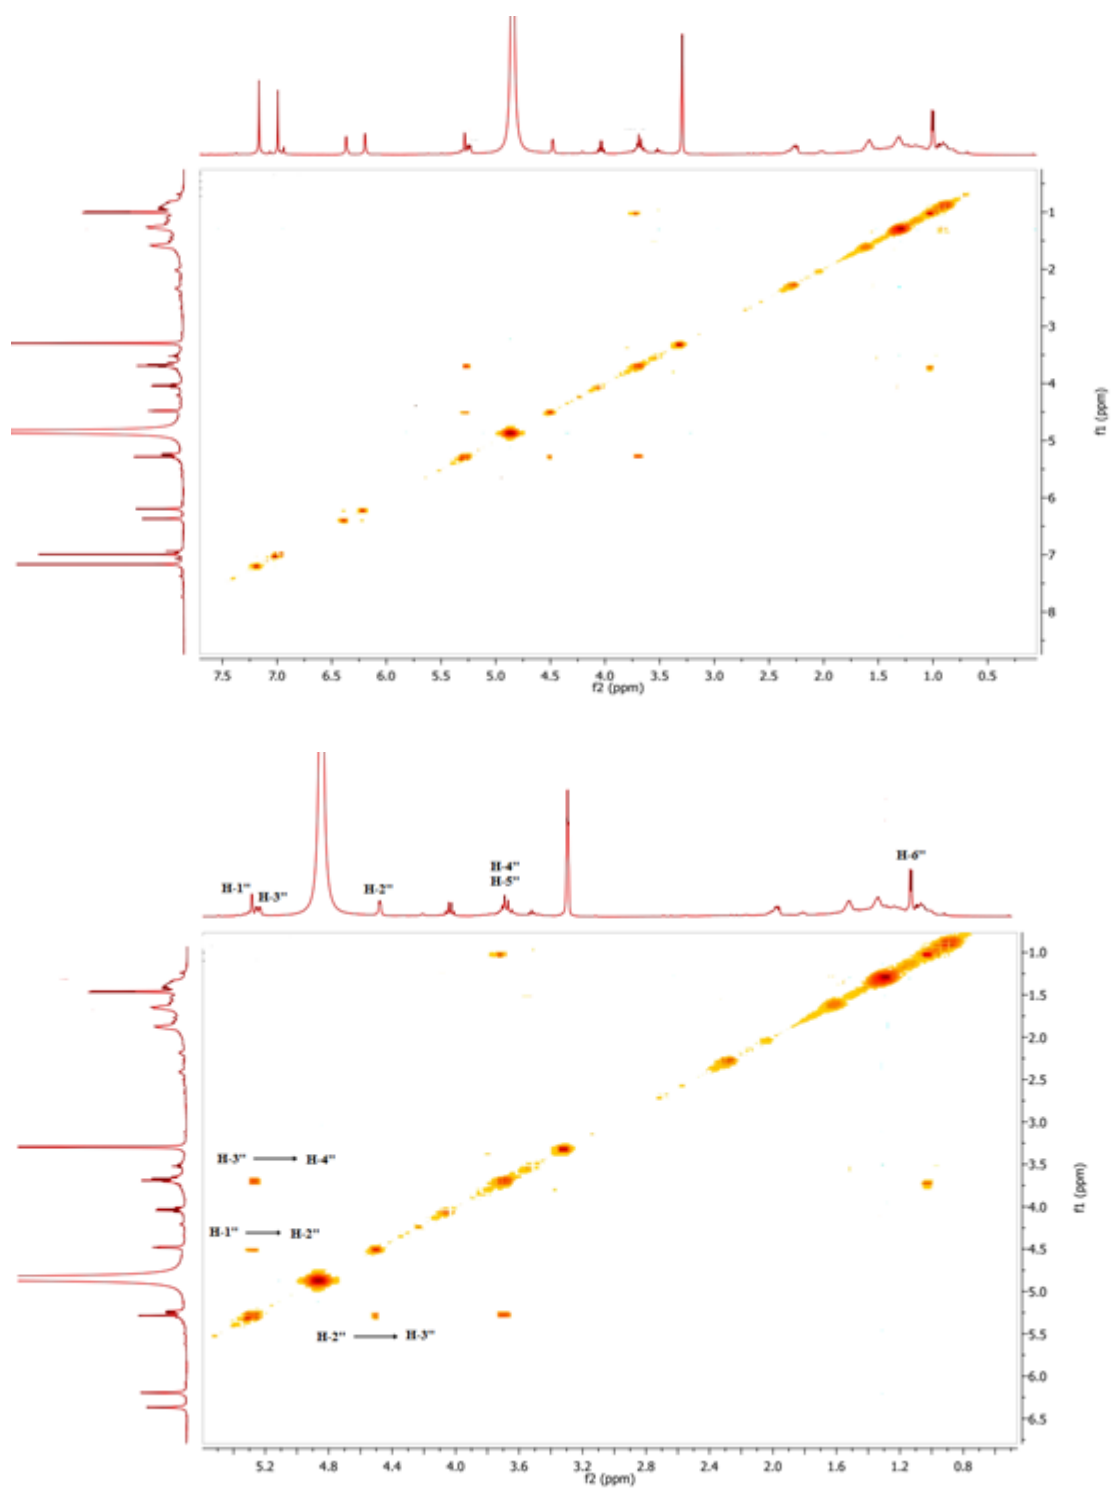

**Fig. S13.** COSY spectrum of compound **3**

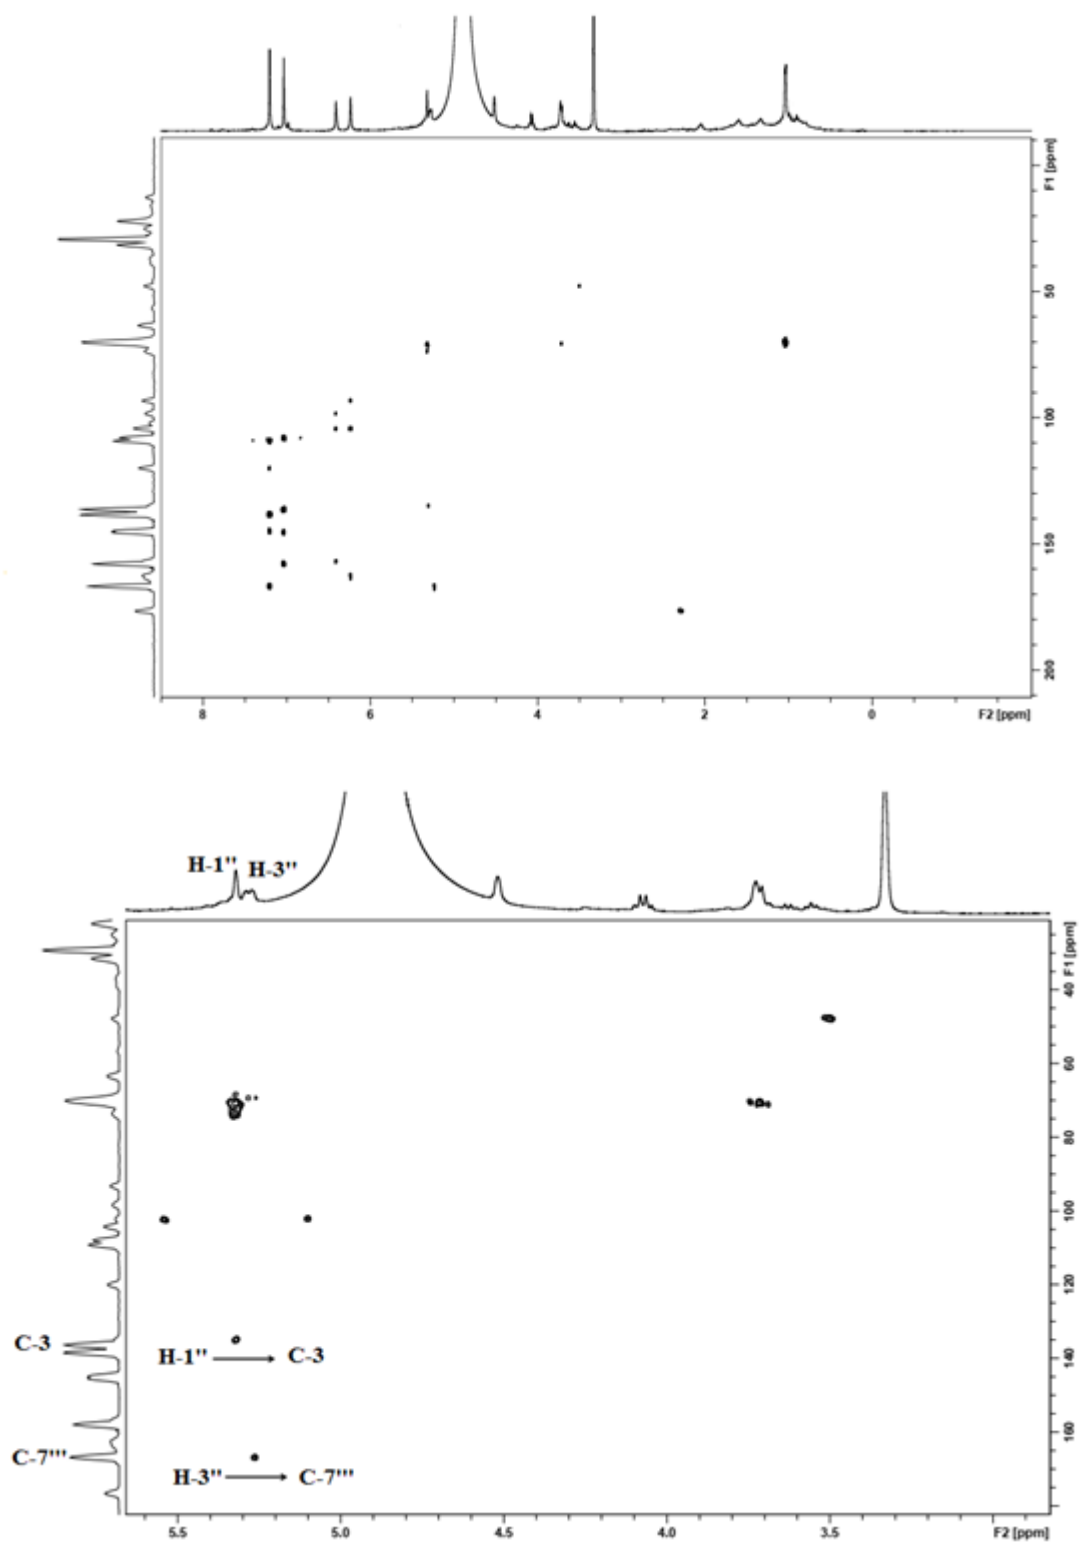

**Fig. S14.** HMBC spectrum of compound **3**

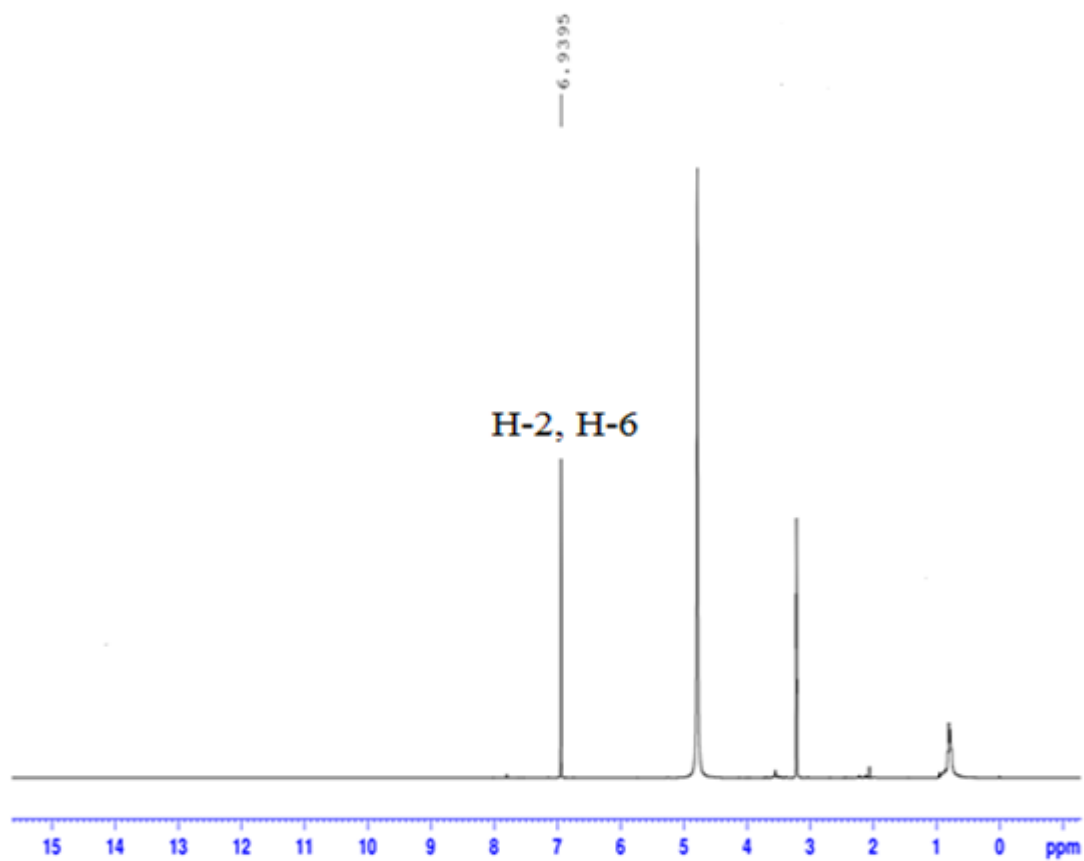

Fig. S15. <sup>1</sup>H-NMR spectrum (400 MHz, CD<sub>3</sub>OD) of compound **4**

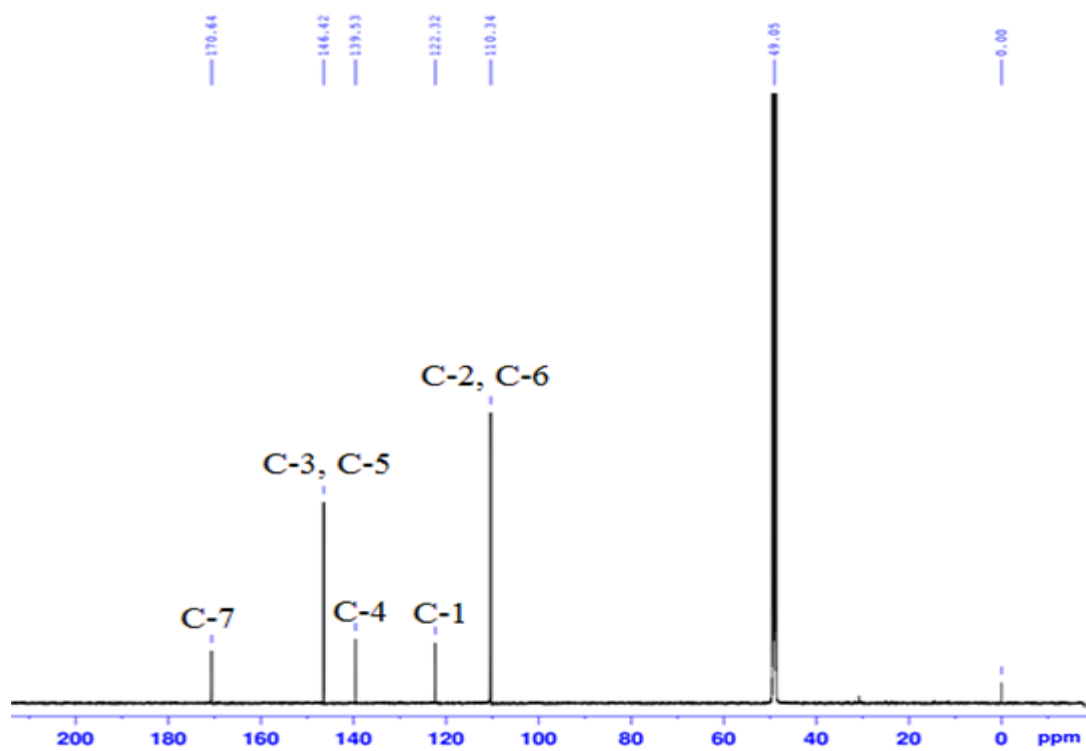

Fig. S16. <sup>13</sup>C-NMR spectrum (100 MHz, CD<sub>3</sub>OD) of compound **4**

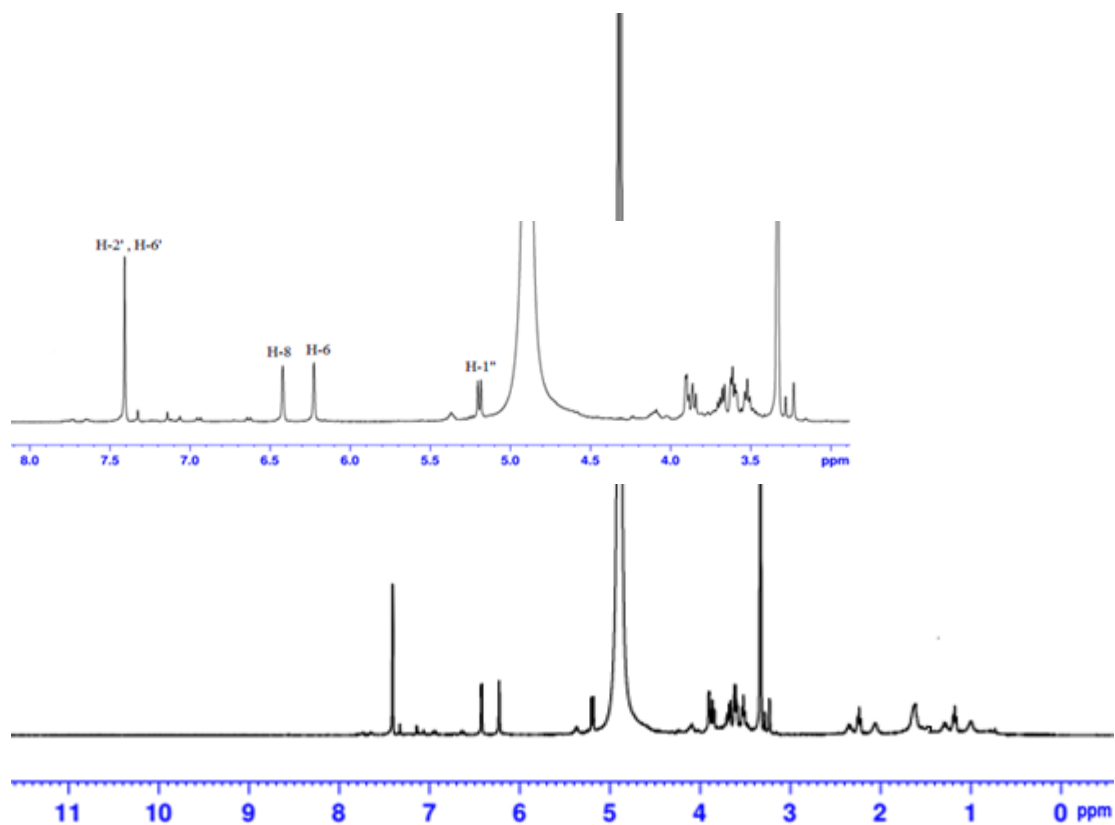

**Fig. S17.**  $^1\text{H-NMR}$  spectrum (400 MHz,  $\text{CD}_3\text{OD}$ ) of compound **5**

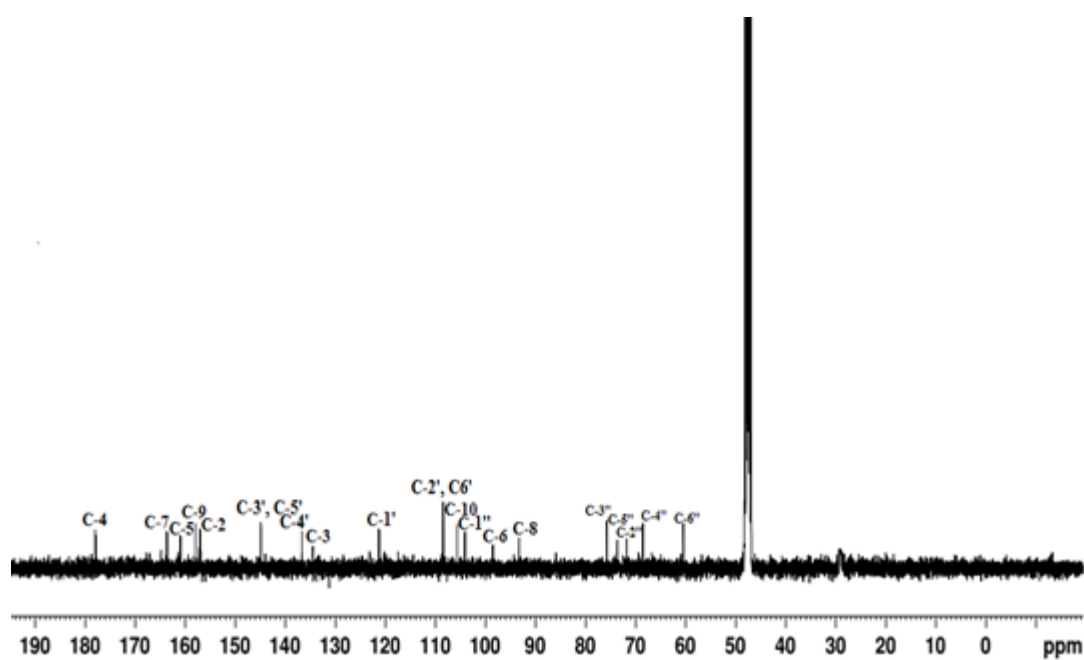

**Fig. S18.**  $^{13}\text{C-NMR}$  spectrum (100 MHz,  $\text{CD}_3\text{OD}$ ) of compound **5**

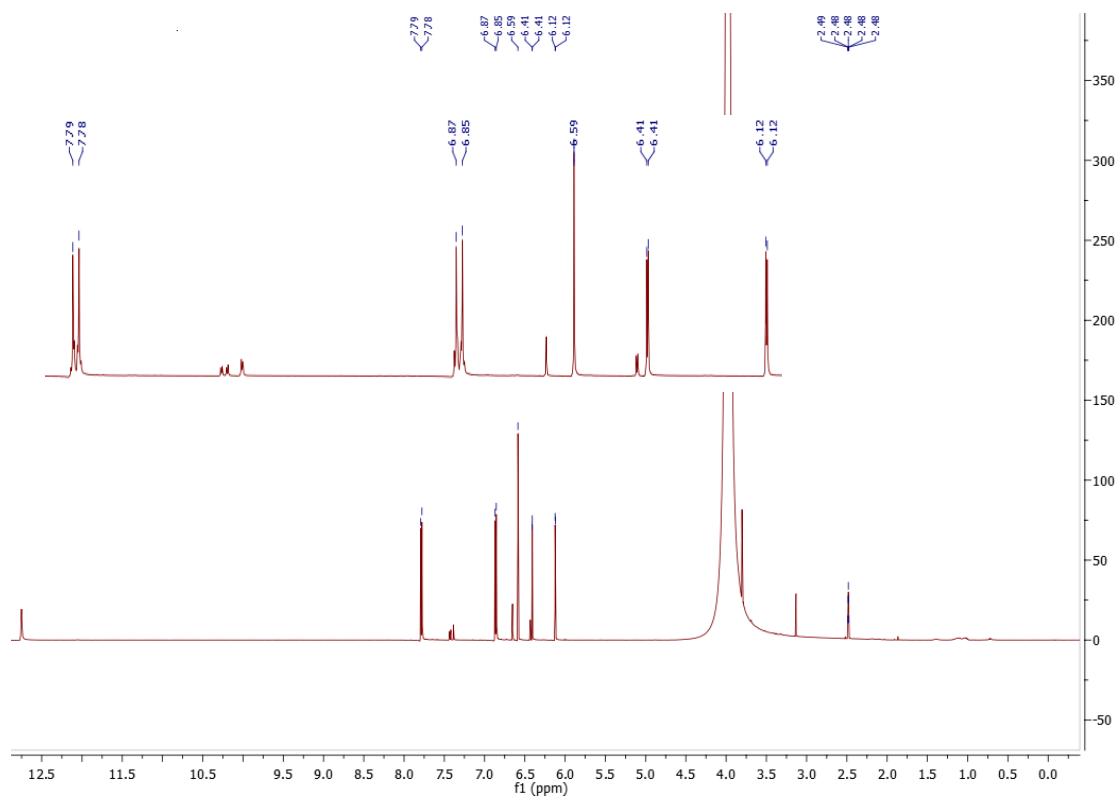

**Fig. S19.**  $^1\text{H}$ -NMR spectrum (600 MHz, DMSO- $d_6$ ) of compound **6**

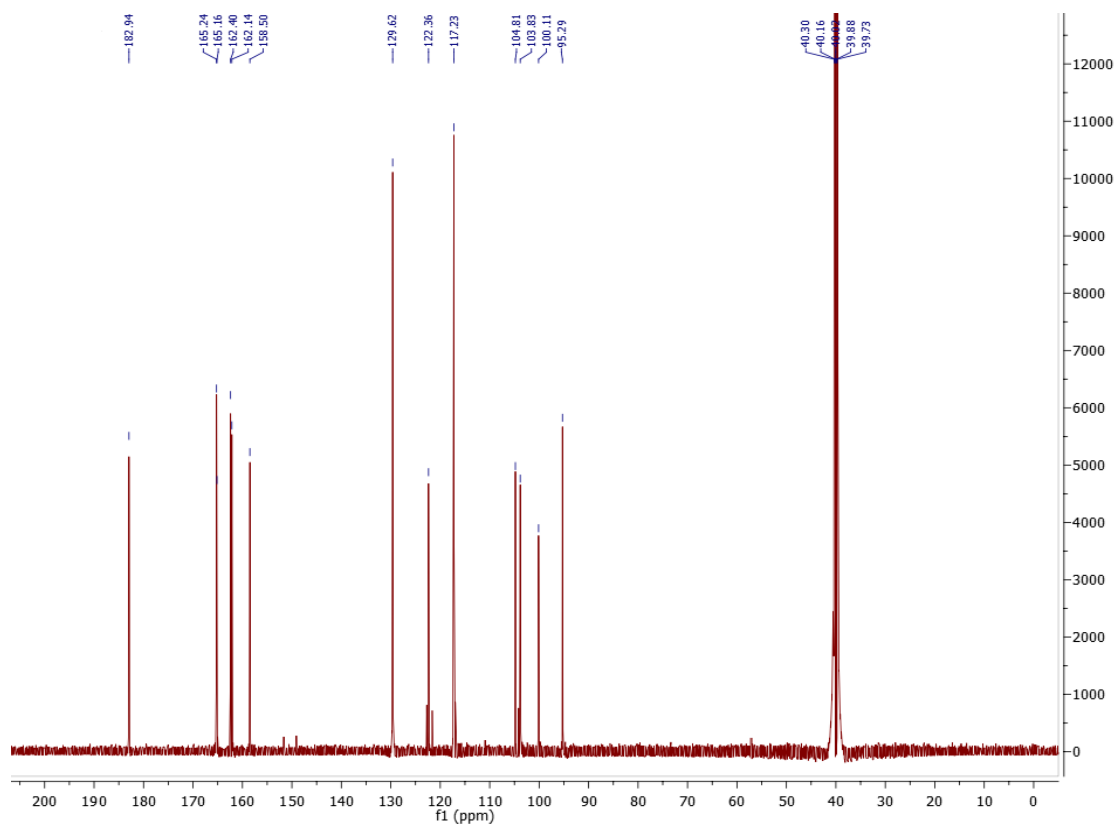

**Fig. S20.**  $^{13}\text{C}$ -NMR spectrum (150 MHz, DMSO- $d_6$ ) of compound **6**



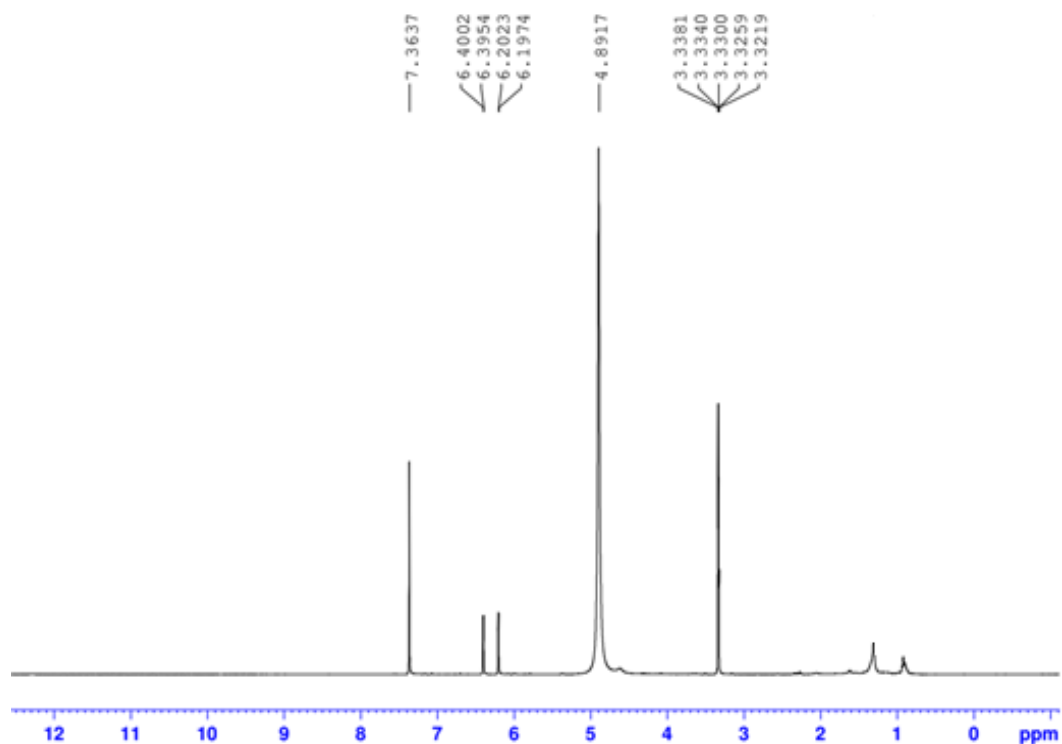

Fig. S21.  $^1\text{H}$ -NMR spectrum (400 MHz,  $\text{CD}_3\text{OD}$ ) of compound **7**

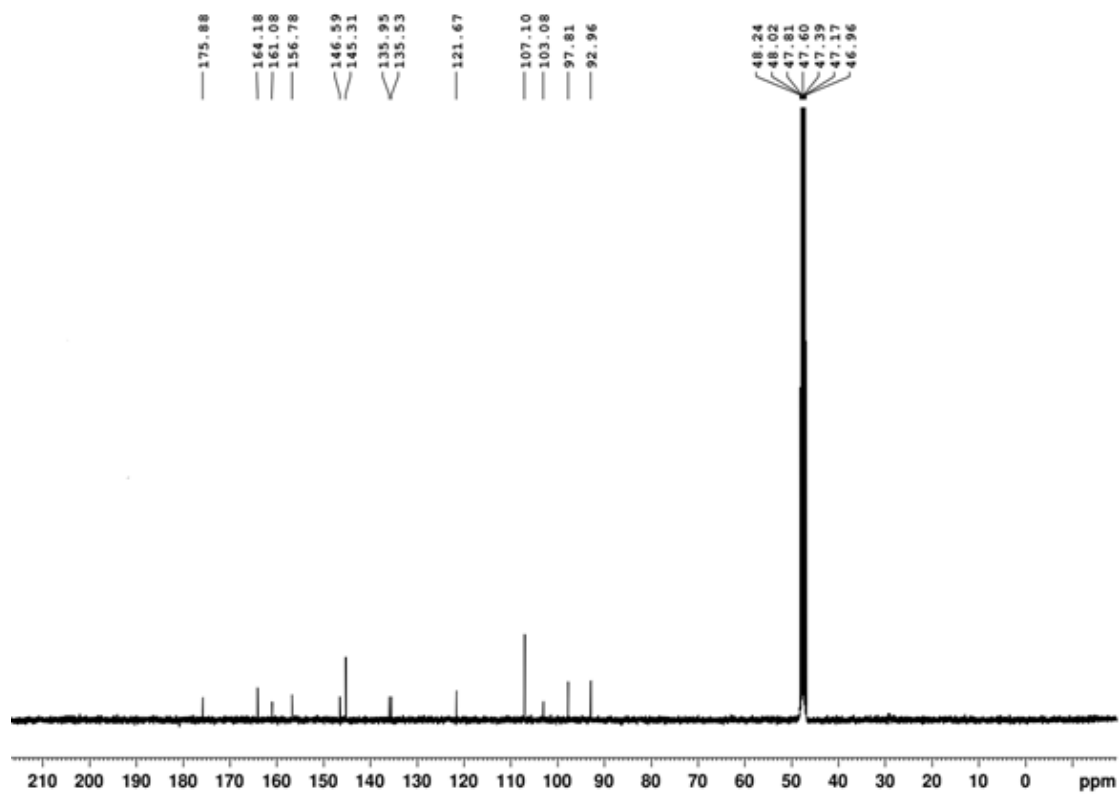

Fig. S22.  $^{13}\text{C}$ -NMR spectrum (100 MHz,  $\text{CD}_3\text{OD}$ ) of compound **7**

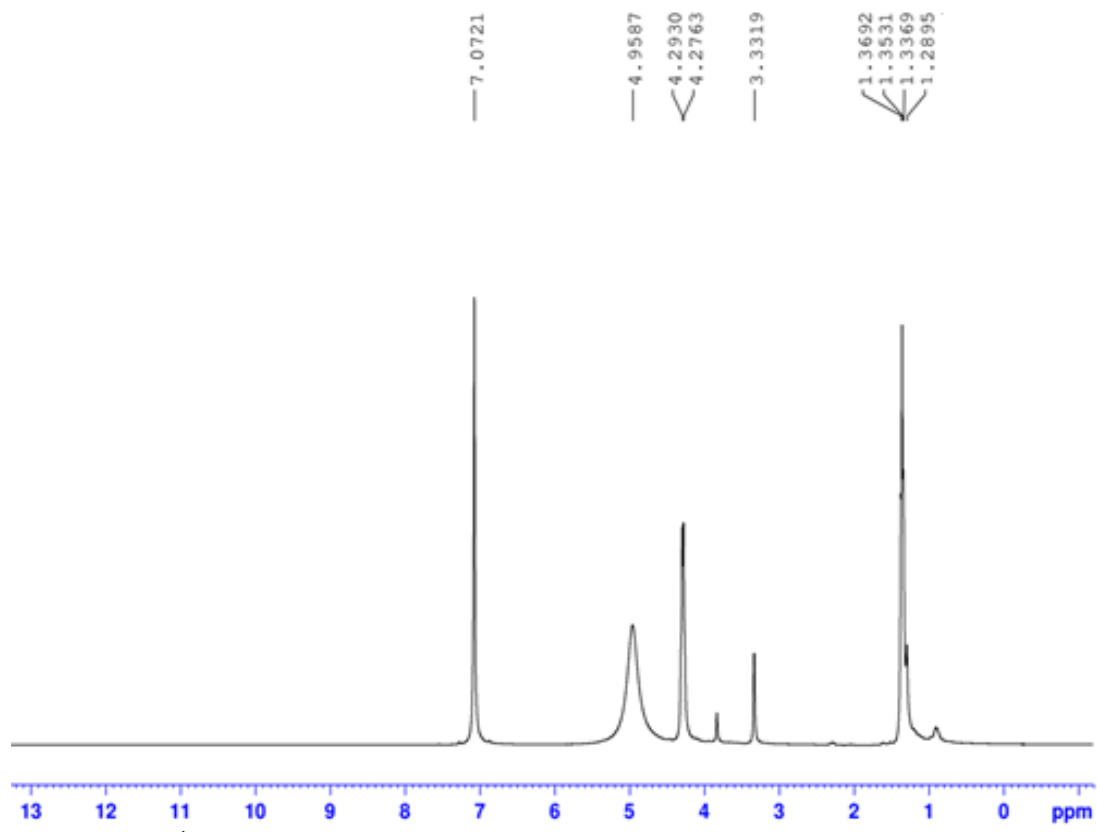

**Fig. S23.**  $^1\text{H}$ -NMR spectrum (400 MHz,  $\text{CD}_3\text{OD}$ ) of compound **8**

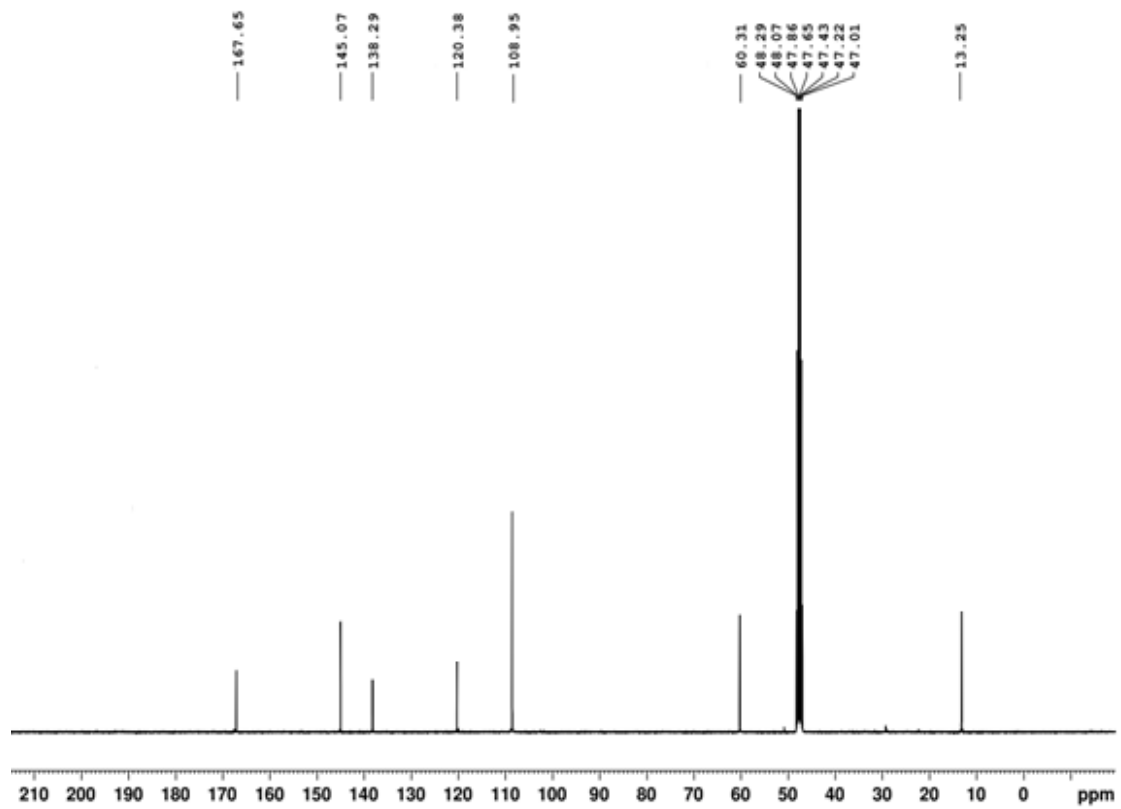

**Fig. S24.**  $^{13}\text{C}$ -NMR spectrum (100 MHz,  $\text{CD}_3\text{OD}$ ) of compound **8**

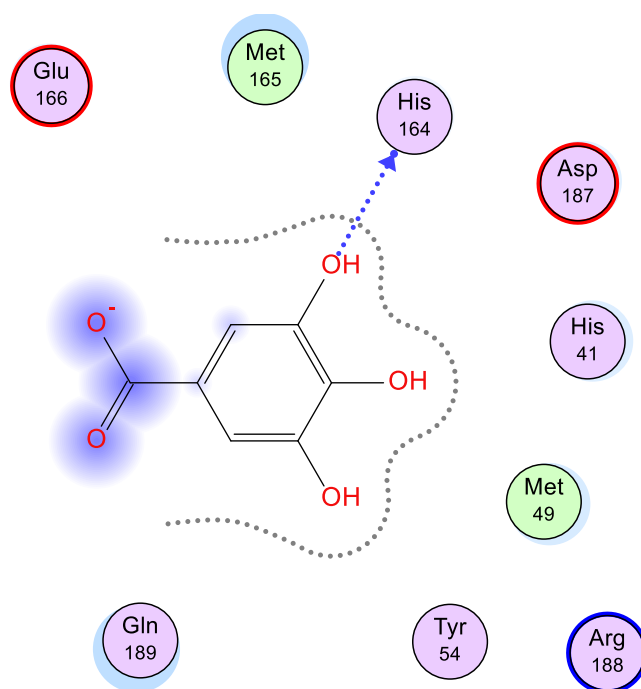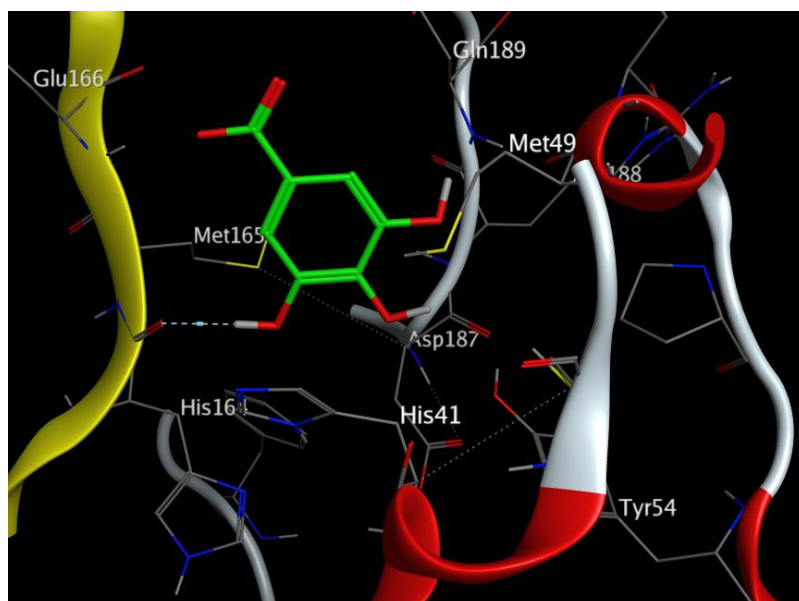

**Fig. S25.** 2D and 3D ligand interactions of compound 4 with main protease receptor

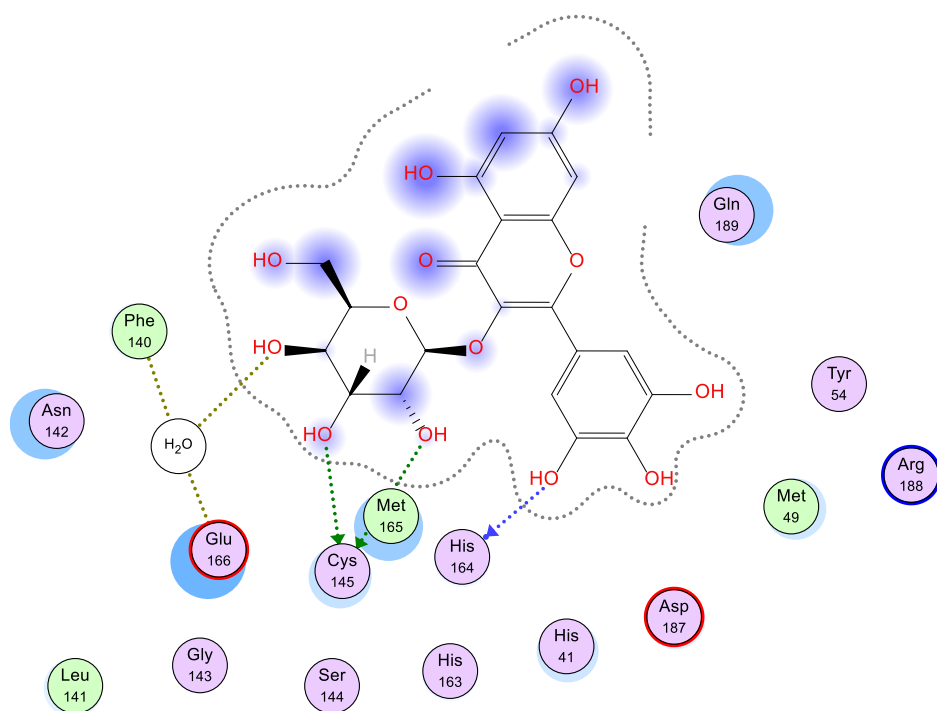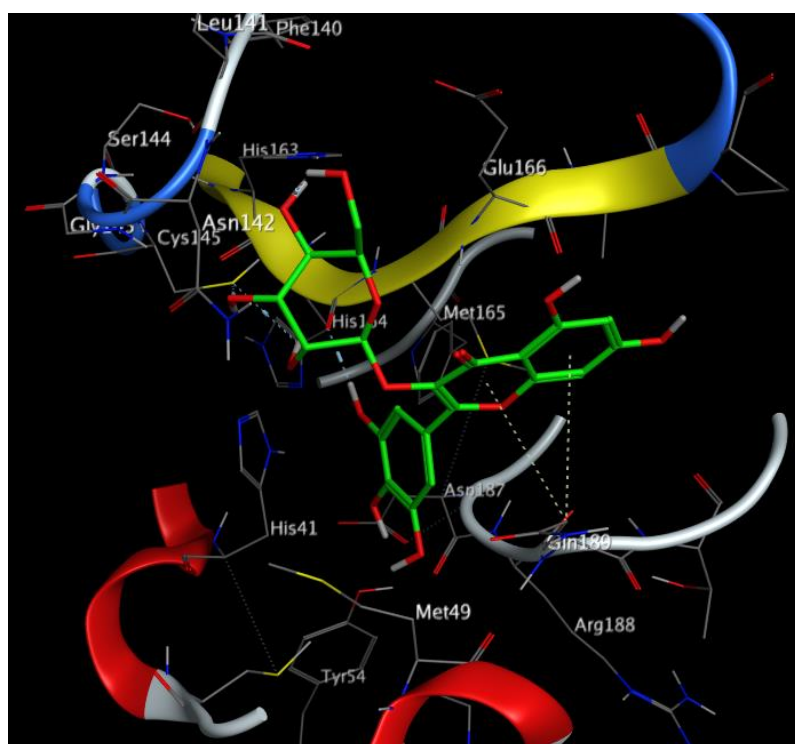

**Fig. S26.** 2D and 3D ligand interactions of compound **5** with main protease receptor

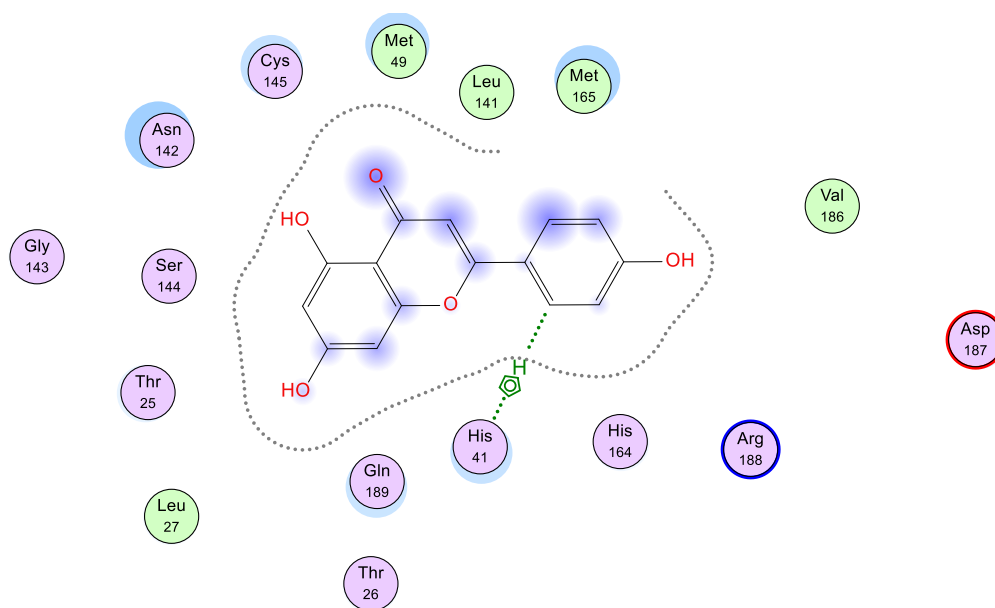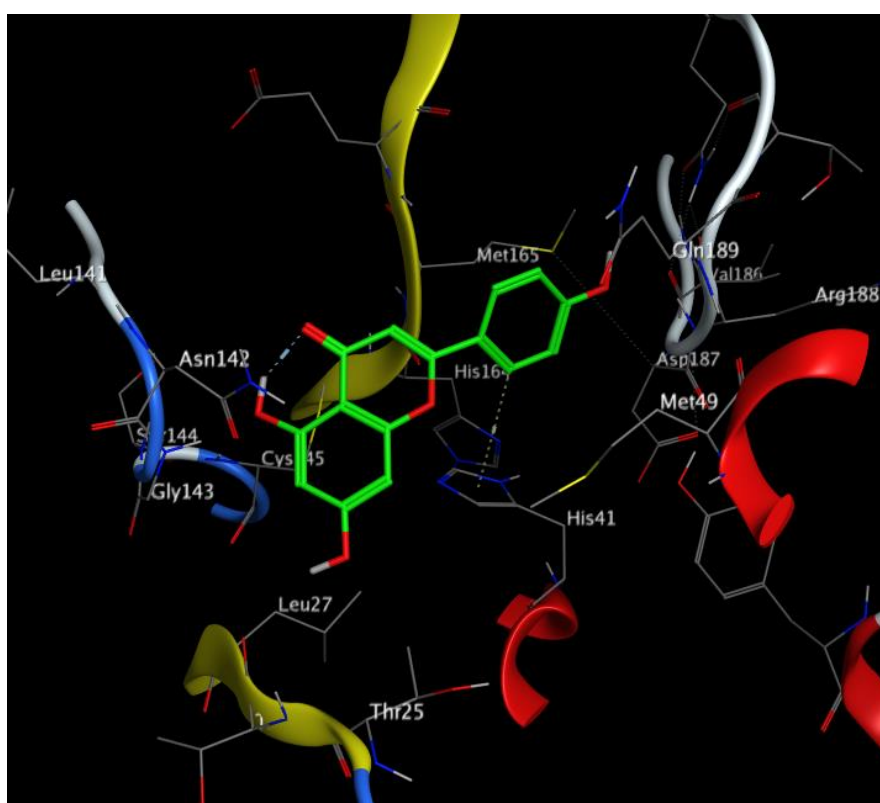

**Fig. S27.** 2D and 3D ligand interactions of compound 6 with main protease receptor

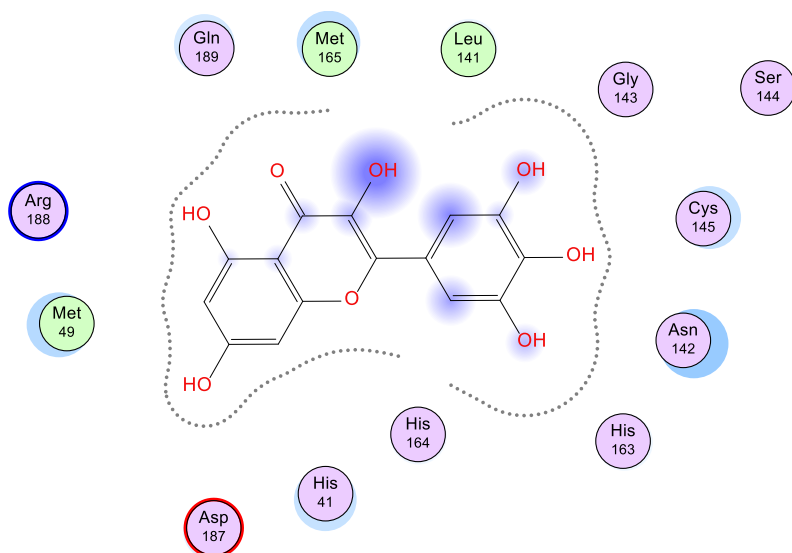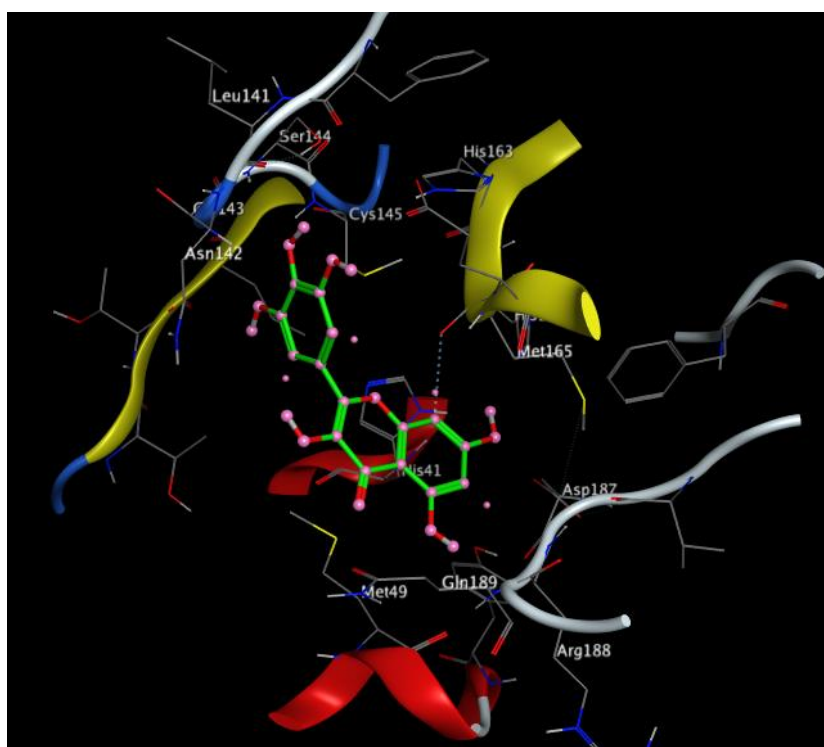

**Fig. S28.** 2D and 3D ligand interactions of compound **7** with main protease receptor

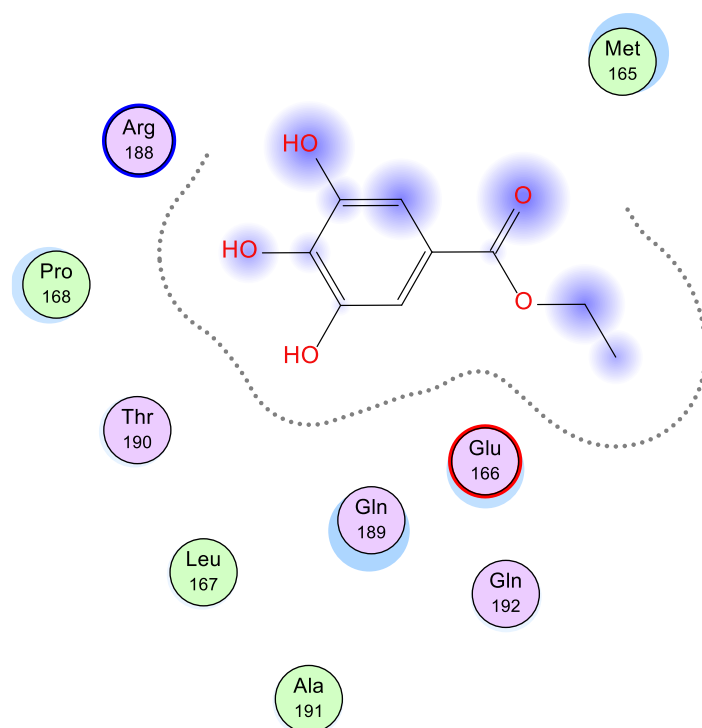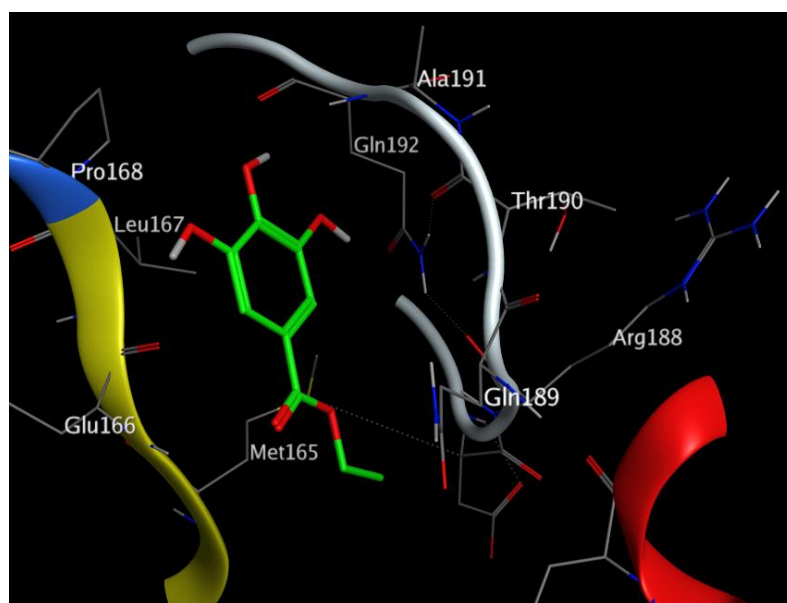

**Fig. S29.** 2D and 3D ligand interactions of compound **8** with main protease receptor

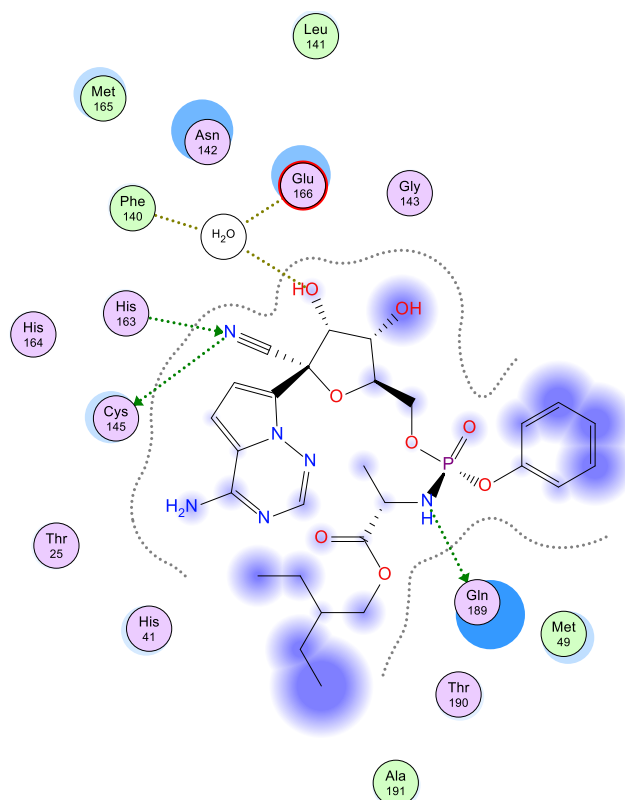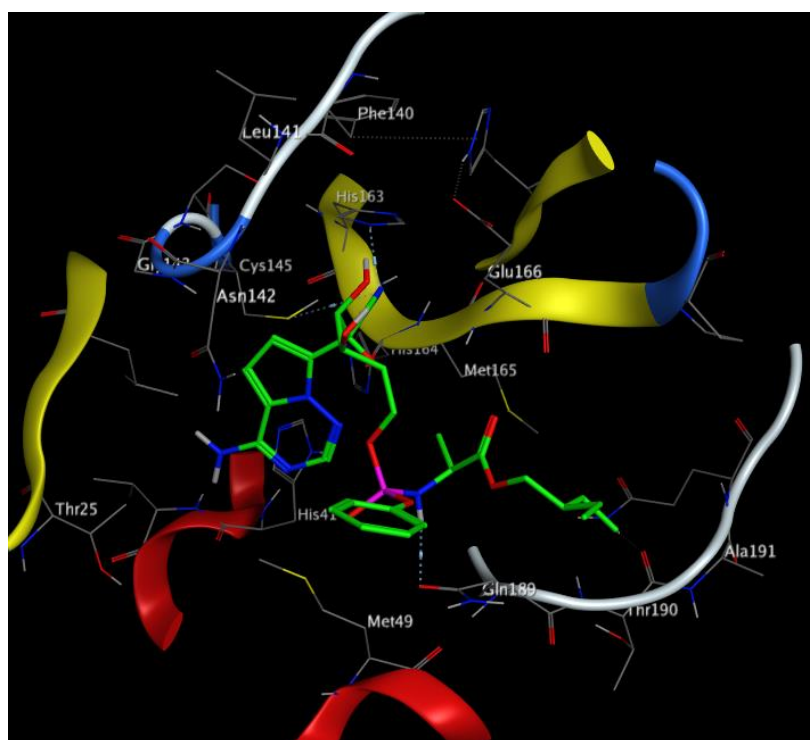

**Fig. S30.** 2D and 3D ligand interactions of compound **Remdesivir** with main protease receptor



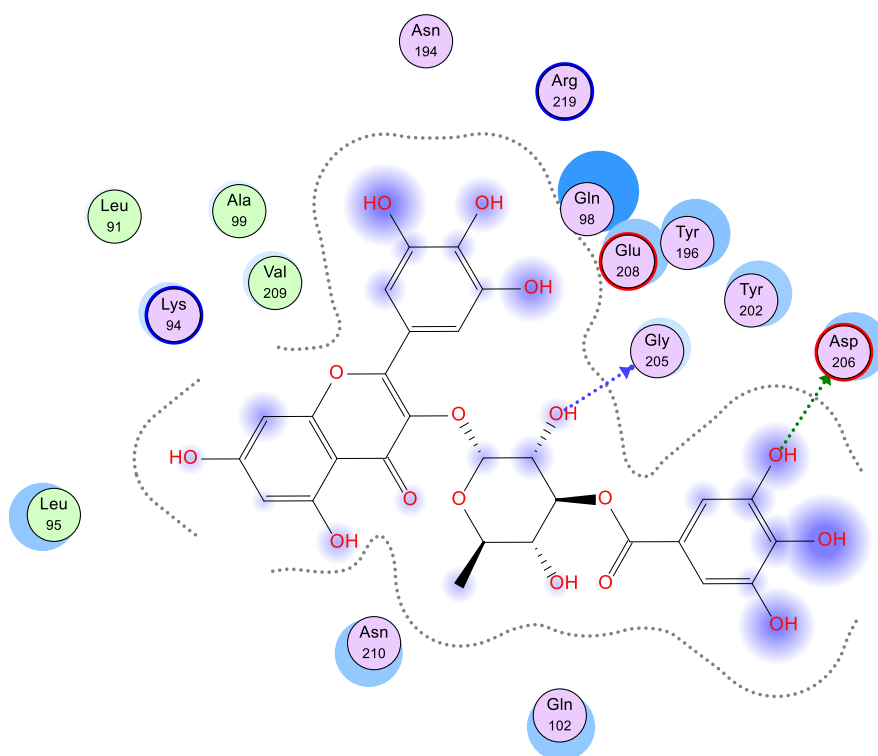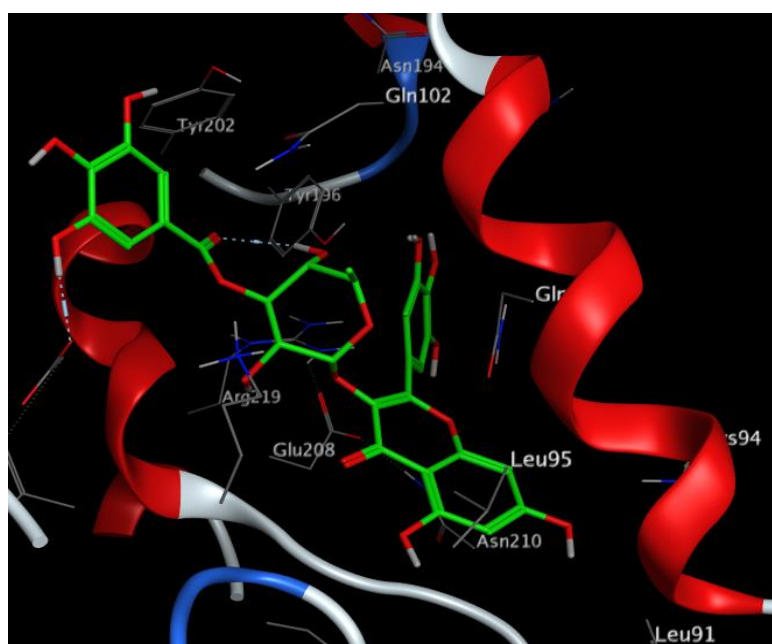

**Fig. 31.** 2D and 3D ligand interactions of compound **3** with spike glycoprotein

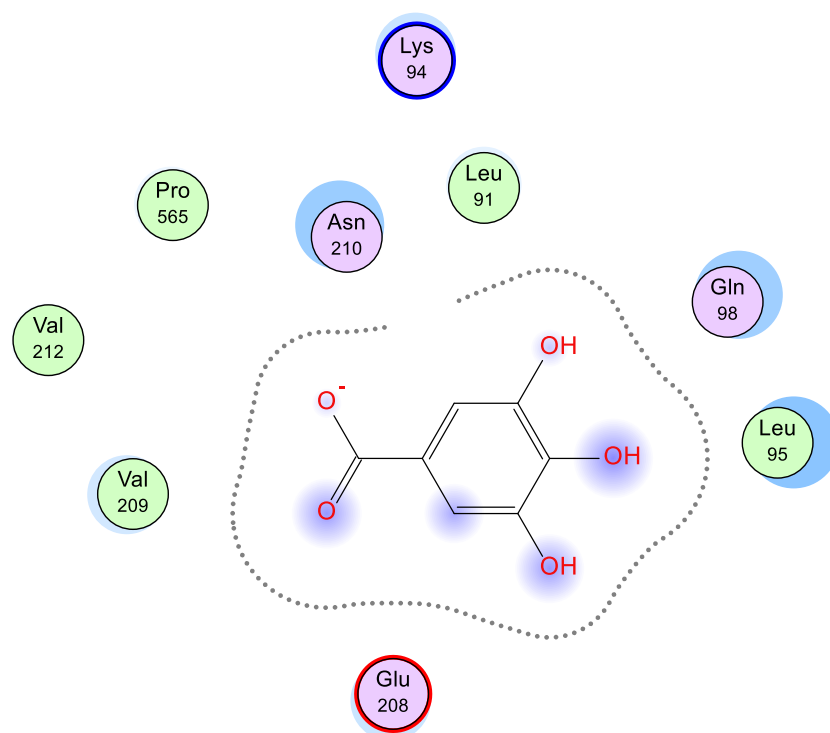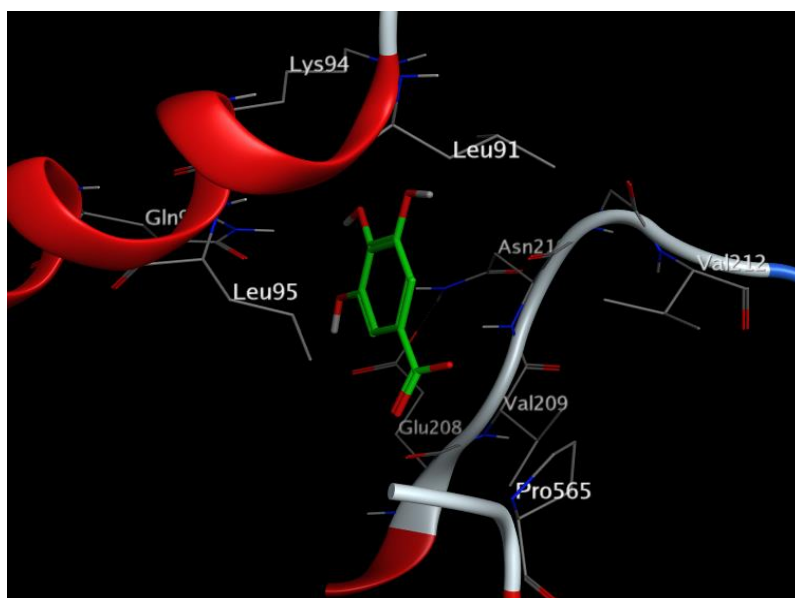

**Fig. S32.** 2D and 3D ligand interactions of compound **4** with spike glycoprotein

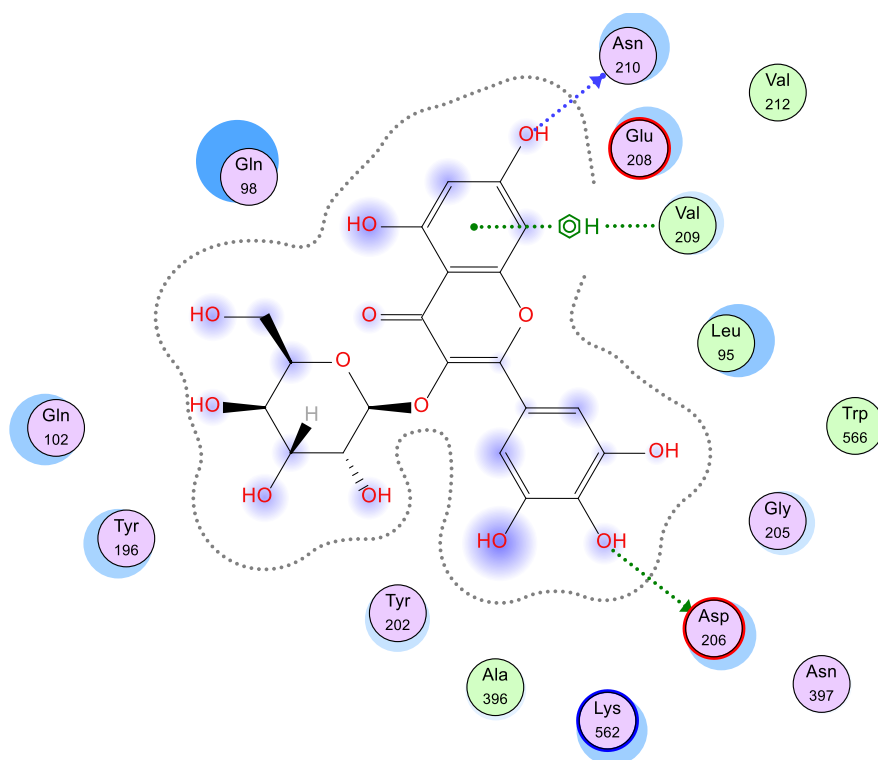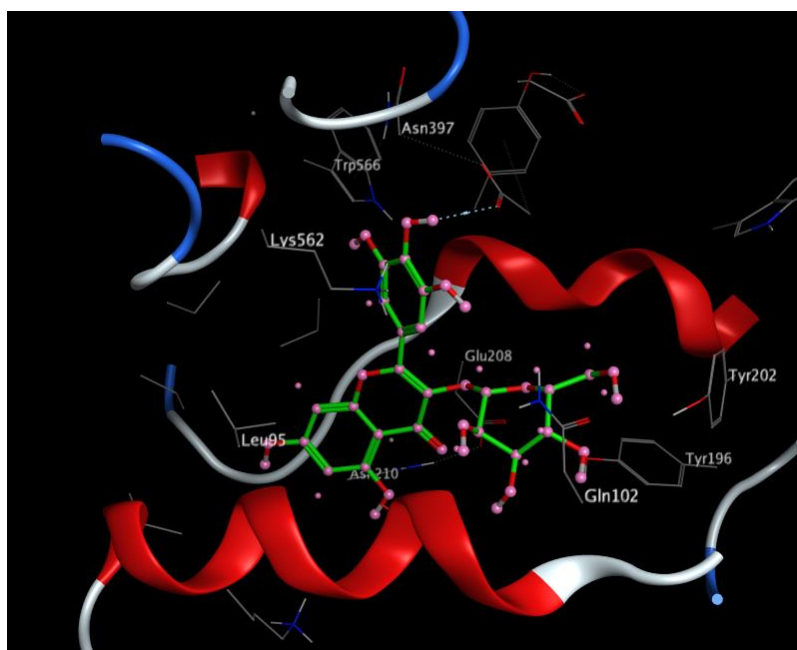

**Fig. S33.** 2D and 3D ligand interactions of compound **5** with spike glycoprotein

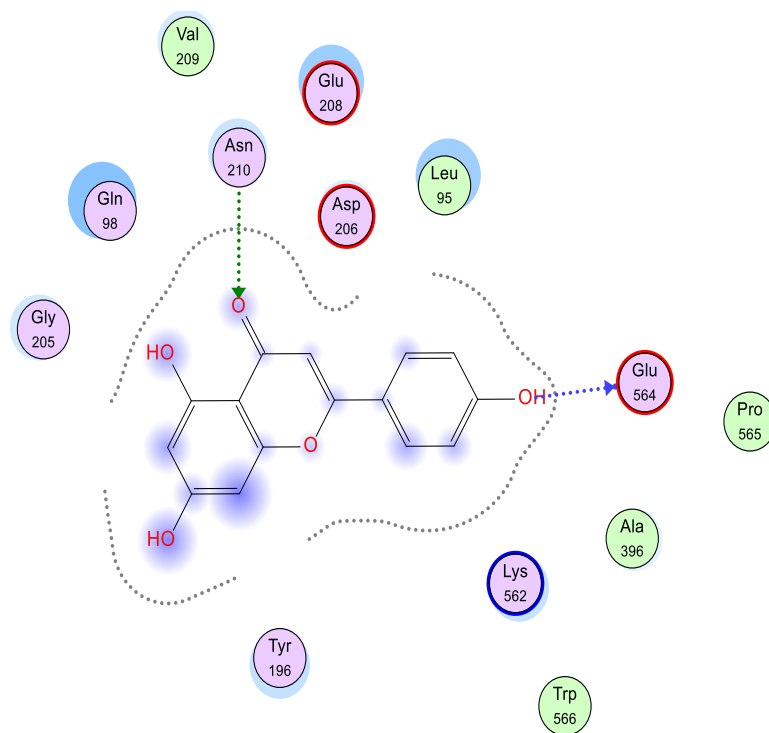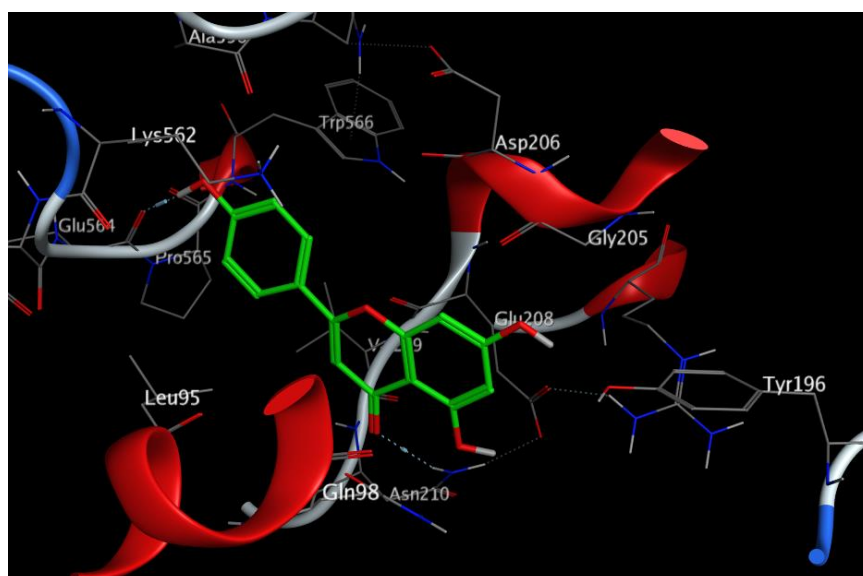

**Fig. S34.** 2D and 3D ligand interactions of compound 6 with spike glycoprotein

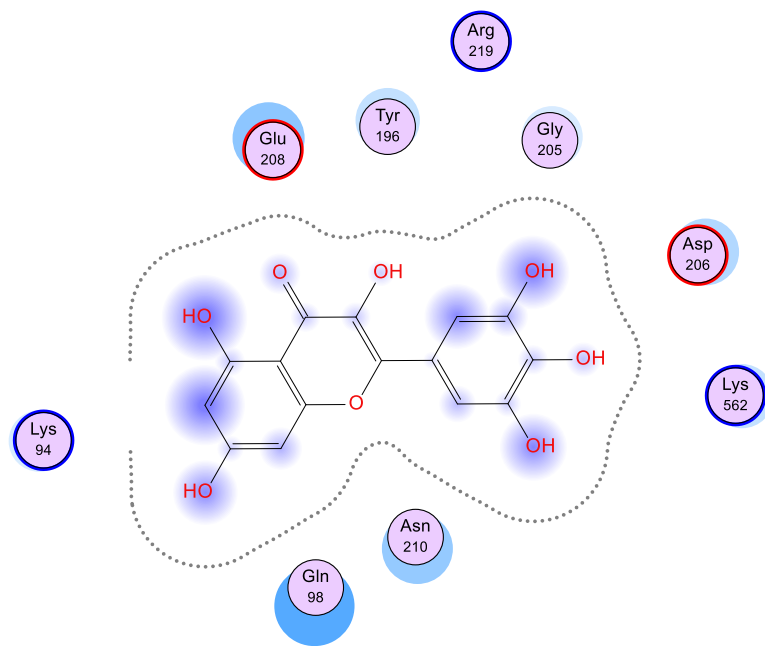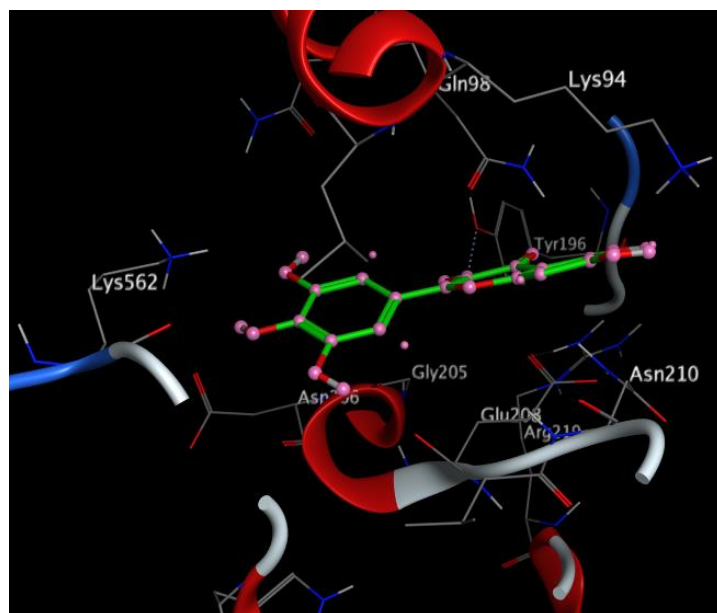

**Fig. S35.** 2D and 3D ligand interactions of compound 7 with spike glycoprotein

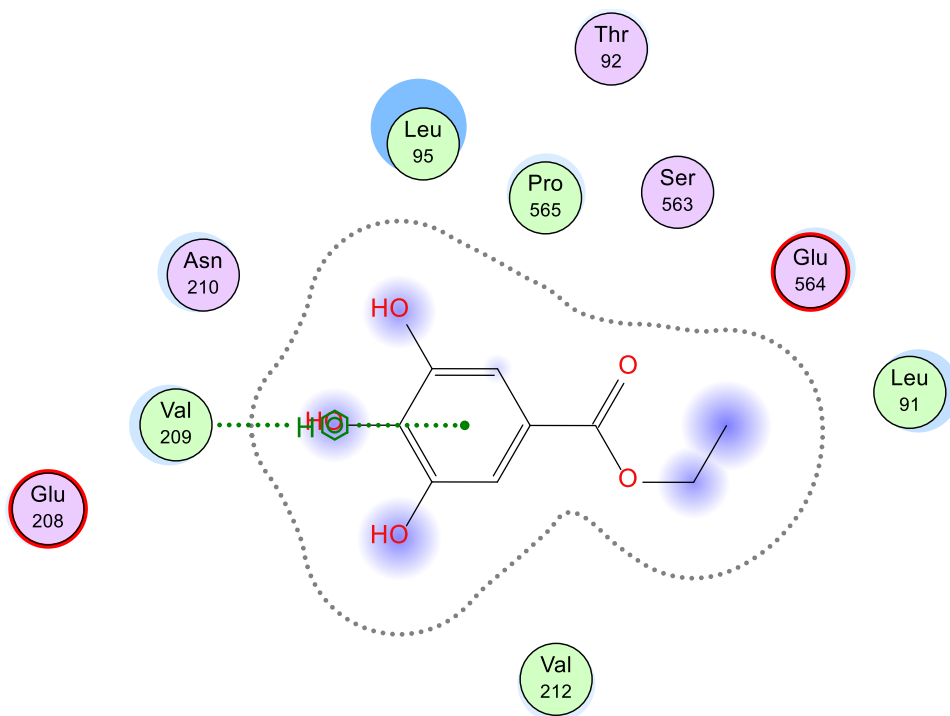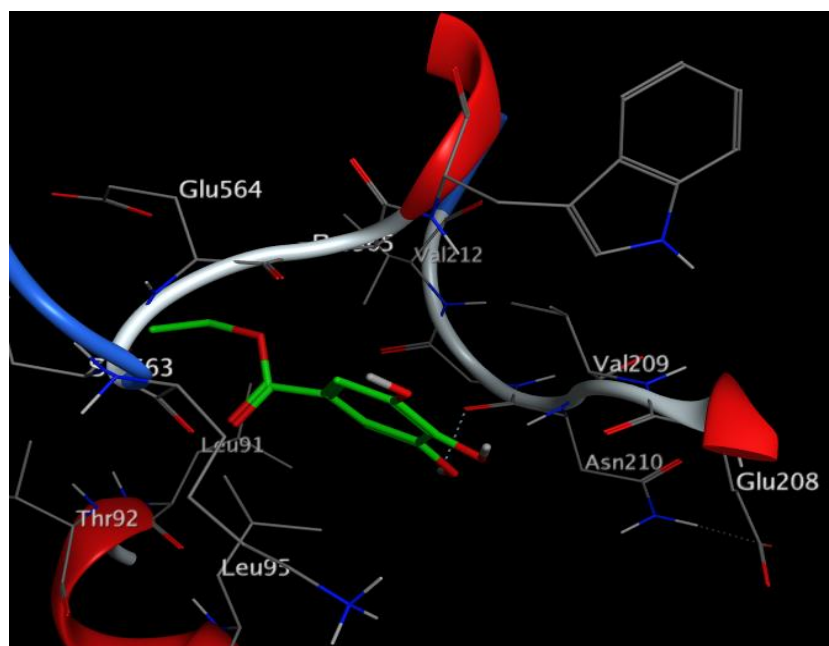

**Fig. S36.** 2D and 3D ligand interactions of compound **8** with spike glycoprotein

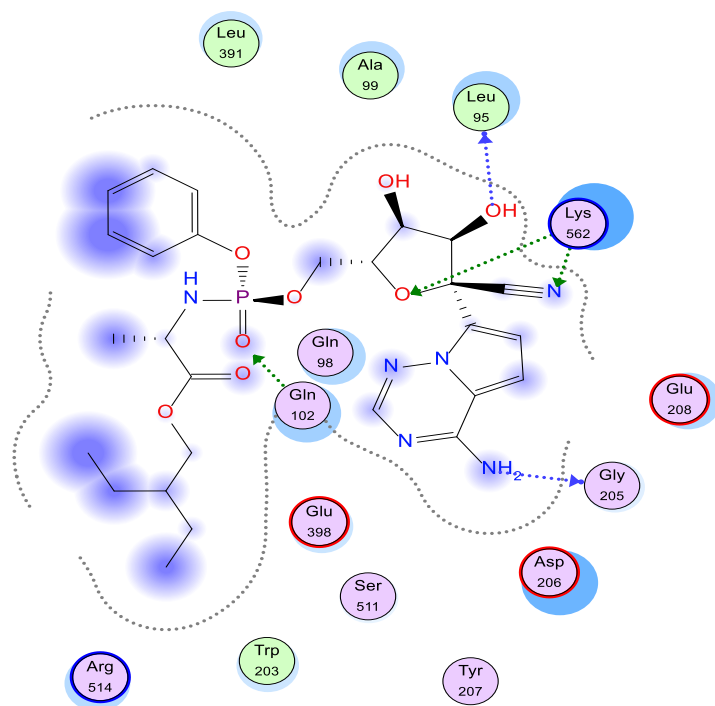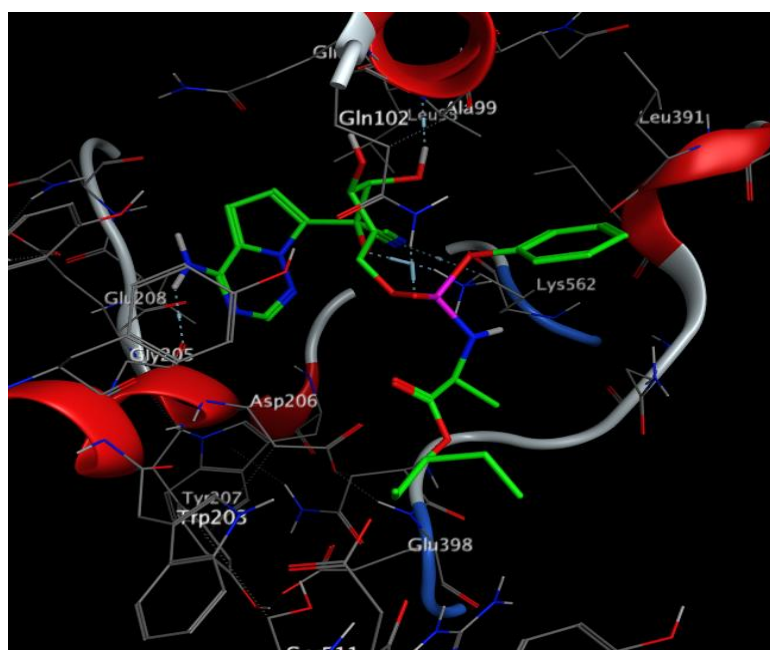

**Fig. S37.** 2D and 3D ligand interactions of compound **remdesivir** with spike glycoprotein



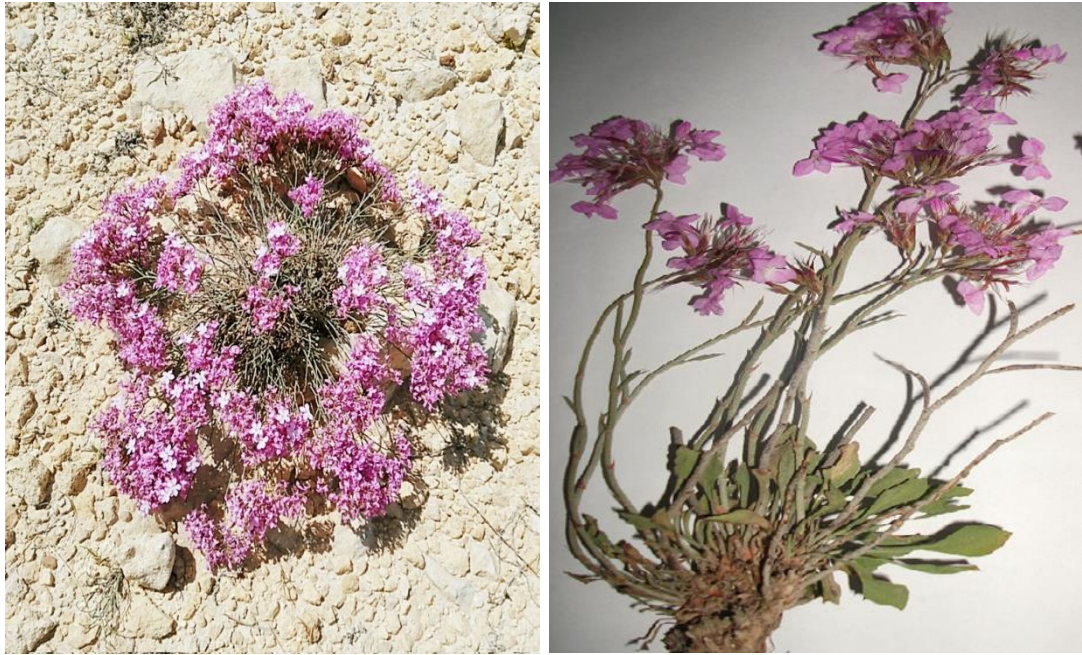

**Fig. S38.** Photo of the aerial parts of *Limonium tubiflorum* (Delile) Kuntze var *tubiflorum*
